# Supplementary material
Source: PubMed Central journal article supplement (PMC7963544)
Supplement: 15-01007.pdf [file 15-01007.pdf]

**On-line Table 1: Up- and down-regulated molecules comparing coiled versus untreated aneurysms, determined by IPA<sup>a</sup>**

| Gene Name       | Description                                                                    | Gene Main Function Determined by Gene Ontology                                                                                                               | Fold Change | P Value  | False Discovery Rate (q Value) | Direction of Expression |
|-----------------|--------------------------------------------------------------------------------|--------------------------------------------------------------------------------------------------------------------------------------------------------------|-------------|----------|--------------------------------|-------------------------|
| <i>ABC6</i>     | ATP-binding cassette, sub-family B (MDR/TAP), member 6 (Langereis blood group) | Integral component of mitochondrial outer membrane                                                                                                           | 2.541       | 4.28E-05 | 5.90E-04                       | Up-regulated            |
| <i>ABCC1</i>    | ATP-binding cassette, sub-family C (CFTR/MRP), member 1                        | ATPase activity, coupled to transmembrane movement of substances                                                                                             | 3.132       | 4.94E-10 | 6.17E-08                       | Up-regulated            |
| <i>ACOT11</i>   | Acyl-coa thioesterase II                                                       | Carboxylic ester hydrolase activity                                                                                                                          | 3.973       | 2.58E-04 | 2.42E-03                       | Up-regulated            |
| <i>ADAM10</i>   | ADAM metallopeptidase domain 10                                                | PMA-inducible membrane protein ectodomain proteolysis                                                                                                        | 3.425       | 1.33E-04 | 1.44E-03                       | Up-regulated            |
| <i>ADAM8</i>    | ADAM metallopeptidase domain 8                                                 | Positive regulation of tumor necrosis factor (ligand) superfamily member II production                                                                       | 3.417       | 1.42E-13 | 6.74E-11                       | Up-regulated            |
| <i>ADAMTS4</i>  | ADAM metallopeptidase with thrombospondin type 1 motif, 4                      | Proteinaceous extracellular matrix                                                                                                                           | 2.134       | 2.49E-08 | 1.52E-06                       | Up-regulated            |
| <i>ADH4</i>     | Alcohol dehydrogenase 4 (class II), pi polypeptide                             | Oxidoreductase activity, acting on the aldehyde or oxo group of donors, NAD or NADP as acceptor                                                              | -2.657      | 4.44E-05 | 6.04E-04                       | Down-regulated          |
| <i>ADORA2B</i>  | Adenosine A2b receptor                                                         | Positive regulation of chronic inflammatory response to non-antigenic stimulus                                                                               | 2.056       | 1.95E-05 | 3.22E-04                       | Up-regulated            |
| <i>AK4</i>      | Adenylate kinase 4                                                             | Nucleoside triphosphate adenylate kinase activity                                                                                                            | 2.074       | 1.96E-08 | 1.25E-06                       | Up-regulated            |
| <i>ALCAM</i>    | Activated leukocyte cell adhesion molecule                                     | External side of plasma membrane                                                                                                                             | 2.575       | 5.08E-12 | 1.38E-09                       | Up-regulated            |
| <i>ANLN</i>     | Anillin, actin binding protein                                                 | Hematopoietic progenitor cell differentiation                                                                                                                | 2.981       | 1.65E-07 | 6.90E-06                       | Up-regulated            |
| <i>AOAH</i>     | Acyloxyacyl hydrolase (neutrophil)                                             | Acyloxyacyl hydrolase activity                                                                                                                               | 2.388       | 2.34E-06 | 5.68E-05                       | Up-regulated            |
| <i>APLN</i>     | Apelin                                                                         | Positive regulation of corticotropin-releasing hormone secretion                                                                                             | 4.238       | 2.53E-08 | 1.52E-06                       | Up-regulated            |
| <i>APOBR</i>    | Apolipoprotein B receptor                                                      | Very-low-density lipoprotein particle receptor activity                                                                                                      | 3.469       | 5.03E-11 | 9.14E-09                       | Up-regulated            |
| <i>AQP4</i>     | Aquaporin 4                                                                    | Multicellular organismal water homeostasis                                                                                                                   | -2.236      | 1.10E-06 | 3.10E-05                       | Down-regulated          |
| <i>AQP9</i>     | Aquaporin 9                                                                    | Pyrimidine nucleobase transmembrane transporter activity                                                                                                     | 3.773       | 8.71E-08 | 4.21E-06                       | Up-regulated            |
| <i>ARG1</i>     | Arginase 1                                                                     | Cellular response to transforming growth factor $\beta$ stimulus                                                                                             | 4.363       | 1.46E-09 | 1.49E-07                       | Up-regulated            |
| <i>ARHGAP25</i> | Rho GTPase activating protein 25                                               | Regulation of small GTPase mediated signal transduction                                                                                                      | 2.275       | 2.28E-09 | 2.21E-07                       | Up-regulated            |
| <i>ART3</i>     | ADP-ribosyltransferase 3                                                       | NAD(P) $\pm$ protein-arginine ADP-ribosyltransferase activity                                                                                                | -2.691      | 5.08E-08 | 2.68E-06                       | Down-regulated          |
| <i>ASB5</i>     | Ankyrin repeat and SOCS box containing 5                                       | Intracellular signal transduction                                                                                                                            | 5.114       | 5.83E-11 | 1.04E-08                       | Up-regulated            |
| <i>ASPM</i>     | Asp (abnormal spindle) homolog, microcephaly associated (Drosophila)           | Positive regulation of canonical Wnt signaling pathway                                                                                                       | 3.715       | 1.08E-09 | 1.16E-07                       | Up-regulated            |
| <i>ATP6V0D2</i> | Atpase, H+ transporting, lysosomal 38kDa, V0 subunit d2                        | Vacuolar proton-transporting V-type ATPase complex                                                                                                           | 5.247       | 1.19E-15 | 2.38E-12                       | Up-regulated            |
| <i>ATP6V1A</i>  | Atpase, H+ transporting, lysosomal 70kDa, V1 subunit A                         | Proton-transporting ATPase activity, rotational mechanism                                                                                                    | 2.036       | 1.04E-09 | 1.15E-07                       | Up-regulated            |
| <i>ATP8B4</i>   | Atpase, class I, type 8B, member 4                                             | Phospholipid-translocating ATPase activity                                                                                                                   | 2.028       | 3.58E-08 | 2.03E-06                       | Up-regulated            |
| <i>AURKB</i>    | Aurora kinase B                                                                | Anaphase-promoting complex-dependent proteasomal ubiquitin-dependent protein catabolic process                                                               | 3.068       | 1.52E-05 | 2.64E-04                       | Up-regulated            |
| <i>B3GALNT1</i> | Beta-1,3-N-acetylgalactosaminyltransferase 1 (globoside blood group)           | Galactosylgalactosylglucosylceramide $\beta$ -D-acetylgalactosaminyltransferase activity                                                                     | 2.588       | 2.05E-05 | 3.34E-04                       | Up-regulated            |
| <i>BANK1</i>    | B-cell scaffold protein with ankyrin repeats 1                                 | Negative regulation of protein kinase B signaling                                                                                                            | 2.906       | 6.26E-09 | 5.01E-07                       | Up-regulated            |
| <i>BASPI</i>    | Brain abundant, membrane attached signal protein 1                             | Positive regulation of metanephric ureteric bud development                                                                                                  | 2.576       | 4.77E-10 | 6.11E-08                       | Up-regulated            |
| <i>BATF</i>     | Basic leucine zipper transcription factor, ATF-like                            | RNA polymerase II core promoter proximal region sequence-specific DNA binding transcription factor activity involved in positive regulation of transcription | 2.041       | 1.23E-04 | 1.35E-03                       | Up-regulated            |
| <i>BCL2L15</i>  | BCL2-like 15                                                                   | Apoptotic process                                                                                                                                            | 2.39        | 2.79E-04 | 2.57E-03                       | Up-regulated            |
| <i>BLK</i>      | BLK proto-oncogene, Src family tyrosine kinase                                 | Transmembrane receptor protein tyrosine kinase signaling pathway                                                                                             | 3.377       | 1.91E-05 | 3.16E-04                       | Up-regulated            |
| <i>BUB1</i>     | BUB1 mitotic checkpoint serine/threonine kinase                                | Positive regulation of intrinsic apoptotic signaling pathway                                                                                                 | 2.613       | 2.96E-05 | 4.43E-04                       | Up-regulated            |
| <i>BUB1B</i>    | BUB1 mitotic checkpoint serine/threonine kinase B                              | Anaphase-promoting complex-dependent proteasomal ubiquitin-dependent protein catabolic process                                                               | 2.989       | 1.34E-08 | 9.08E-07                       | Up-regulated            |
| <i>Clorf16</i>  | Chromosome 11 open reading frame 16                                            | Unknown                                                                                                                                                      | 2.305       | 1.14E-07 | 5.16E-06                       | Up-regulated            |
| <i>Clorf40</i>  | Chromosome 12 open reading frame 40                                            | Protein binding                                                                                                                                              | -2.078      | 1.46E-04 | 1.55E-03                       | Down-regulated          |
| <i>Clorf162</i> | Chromosome 1 open reading frame 162                                            | Integral component of membrane                                                                                                                               | 2.949       | 3.55E-08 | 2.03E-06                       | Up-regulated            |
| <i>Clorf228</i> | Chromosome 1 open reading frame 228                                            | Unknown                                                                                                                                                      | 3.692       | 3.18E-08 | 1.86E-06                       | Up-regulated            |
| <i>C4orf47</i>  | Chromosome 4 open reading frame 47                                             | Centrosome                                                                                                                                                   | 2.351       | 5.23E-06 | 1.10E-04                       | Up-regulated            |
| <i>CA2</i>      | Carbonic anhydrase II                                                          | Positive regulation of dipeptide transmembrane transport                                                                                                     | 5.324       | 2.67E-14 | 2.14E-11                       | Up-regulated            |
| <i>CA9</i>      | Carbonic anhydrase IX                                                          | Regulation of transcription from RNA polymerase II promoter in response to hypoxia                                                                           | 2.045       | 2.16E-06 | 5.30E-05                       | Up-regulated            |
| <i>CAPG</i>     | Capping protein (actin filament), gelsolin-like                                | Positive regulation of podosome assembly                                                                                                                     | 2.042       | 2.38E-07 | 9.24E-06                       | Up-regulated            |
| <i>CASC5</i>    | Cancer susceptibility candidate 5                                              | Attachment of spindle microtubules to kinetochore                                                                                                            | 2.901       | 1.95E-05 | 3.22E-04                       | Up-regulated            |
| <i>CCDC68</i>   | Coiled-coil domain containing 68                                               | Protein binding                                                                                                                                              | -2.216      | 5.51E-06 | 1.14E-04                       | Down-regulated          |
| <i>CCL20</i>    | Chemokine (C-C motif) ligand 20                                                | Positive regulation of nitric-oxide synthase biosynthetic process                                                                                            | 2.926       | 3.64E-07 | 1.35E-05                       | Up-regulated            |
| <i>CCL4</i>     | Chemokine (C-C motif) ligand 4                                                 | Positive regulation of natural killer cell chemotaxis                                                                                                        | 2.307       | 1.99E-06 | 4.97E-05                       | Up-regulated            |

Continued on next page

On-line Table 1: Continued

| Gene Name     | Description                                               | Gene Main Function Determined by Gene Ontology                                                                   | Fold Change | P Value  | False Discovery Rate (q Value) | Direction of Expression |
|---------------|-----------------------------------------------------------|------------------------------------------------------------------------------------------------------------------|-------------|----------|--------------------------------|-------------------------|
| <i>CCL5</i>   | Chemokine (C-C motif) ligand 5                            | Negative regulation of G-protein coupled receptor protein signaling pathway                                      | 4.023       | 2.98E-10 | 4.26E-08                       | Up-regulated            |
| <i>CCNB1</i>  | Cyclin B1                                                 | Positive regulation of ubiquitin-protein ligase activity involved in regulation of mitotic cell cycle transition | 2.835       | 4.02E-07 | 1.45E-05                       | Up-regulated            |
| <i>CCNB2</i>  | Cyclin B2                                                 | G2/M transition of mitotic cell cycle                                                                            | 3.617       | 6.36E-07 | 2.04E-05                       | Up-regulated            |
| <i>CCRI</i>   | Chemokine (C-C motif) receptor 1                          | G-protein coupled receptor signaling pathway, coupled to cyclic nucleotide second messenger                      | 4.059       | 7.57E-14 | 4.02E-11                       | Up-regulated            |
| <i>CCR5</i>   | Chemokine (C-C motif) receptor 5 (gene/pseudogene)        | Release of sequestered calcium ion into cytosol by sarcoplasmic reticulum                                        | 2.797       | 8.41E-11 | 1.42E-08                       | Up-regulated            |
| <i>CCR8</i>   | Chemokine (C-C motif) receptor 8                          | Positive regulation of cytosolic calcium ion concentration                                                       | 3.355       | 4.70E-04 | 3.86E-03                       | Up-regulated            |
| <i>CCRL2</i>  | Chemokine (C-C motif) receptor-like 2                     | G-protein coupled receptor signaling pathway                                                                     | 3.088       | 5.46E-06 | 1.13E-04                       | Up-regulated            |
| <i>CD101</i>  | CD101 molecule                                            | Hydrolase activity, acting on carbon-nitrogen (but not peptide) bonds, in cyclic amides                          | 2.892       | 4.71E-06 | 1.01E-04                       | Up-regulated            |
| <i>CD14</i>   | CD14 molecule                                             | Activation of cysteine-type endopeptidase activity involved in apoptotic signaling pathway                       | 2.059       | 1.68E-05 | 2.85E-04                       | Up-regulated            |
| <i>CD163</i>  | CD163 molecule                                            | Integral component of plasma membrane                                                                            | 2.478       | 6.36E-06 | 1.28E-04                       | Up-regulated            |
| <i>CD19</i>   | CD19 molecule                                             | Positive regulation of release of sequestered calcium ion into cytosol                                           | 2.589       | 2.83E-04 | 2.59E-03                       | Up-regulated            |
| <i>CD1C</i>   | CD1c molecule                                             | Antigen processing and presentation, exogenous lipid antigen via MHC class Ib                                    | 2.843       | 6.48E-08 | 3.25E-06                       | Up-regulated            |
| <i>CD27</i>   | CD27 molecule                                             | Negative regulation of cysteine-type endopeptidase activity involved in apoptotic process                        | 2.146       | 1.24E-05 | 2.21E-04                       | Up-regulated            |
| <i>CD38</i>   | CD38 molecule                                             | Positive regulation of cytosolic calcium ion concentration                                                       | 2.384       | 9.01E-06 | 1.71E-04                       | Up-regulated            |
| <i>CD48</i>   | CD48 molecule                                             | Integral component of plasma membrane                                                                            | 2.297       | 8.12E-09 | 6.19E-07                       | Up-regulated            |
| <i>CD53</i>   | CD53 molecule                                             | Positive regulation of myoblast fusion                                                                           | 2.295       | 4.80E-07 | 1.65E-05                       | Up-regulated            |
| <i>CD68</i>   | CD68 molecule                                             | Cellular response to organic substance                                                                           | 2.852       | 6.07E-09 | 4.89E-07                       | Up-regulated            |
| <i>CD69</i>   | CD69 molecule                                             | Transmembrane signaling receptor activity                                                                        | 2.086       | 1.87E-04 | 1.88E-03                       | Up-regulated            |
| <i>CD72</i>   | CD72 molecule                                             | Transmembrane signaling receptor activity                                                                        | 4.449       | 1.11E-11 | 2.58E-09                       | Up-regulated            |
| <i>CD79B</i>  | CD79b molecule, immunoglobulin-associated $\beta$         | Transmembrane signaling receptor activity                                                                        | 2.731       | 2.67E-05 | 4.13E-04                       | Up-regulated            |
| <i>CD84</i>   | CD84 molecule                                             | Homophilic cell adhesion via plasma membrane adhesion molecules                                                  | 2.222       | 5.36E-07 | 1.77E-05                       | Up-regulated            |
| <i>CDA</i>    | Cytidine deaminase                                        | Nucleobase-containing small molecule metabolic process                                                           | 2.095       | 4.82E-08 | 2.60E-06                       | Up-regulated            |
| <i>CDC20</i>  | Cell division cycle 20                                    | Positive regulation of ubiquitin-protein ligase activity involved in regulation of mitotic cell cycle transition | 2.244       | 6.07E-05 | 7.67E-04                       | Up-regulated            |
| <i>CDCA2</i>  | Cell division cycle associated 2                          | Positive regulation of protein dephosphorylation                                                                 | 2.411       | 6.72E-05 | 8.36E-04                       | Up-regulated            |
| <i>CDCA7</i>  | Cell division cycle associated 7                          | Regulation of transcription, DNA-templated                                                                       | 3.452       | 1.43E-05 | 2.50E-04                       | Up-regulated            |
| <i>CDH18</i>  | Cadherin 18 type 2                                        | Homophilic cell adhesion via plasma membrane adhesion molecules                                                  | -2.039      | 1.72E-04 | 1.77E-03                       | Down-regulated          |
| <i>CDH19</i>  | Cadherin 19 type 2                                        | Calcium-dependent cell-cell adhesion via plasma membrane cell adhesion molecules                                 | -2.025      | 9.47E-06 | 1.78E-04                       | Down-regulated          |
| <i>CDK1</i>   | Cyclin-dependent kinase 1                                 | Positive regulation of ubiquitin-protein ligase activity involved in regulation of mitotic cell cycle transition | 2.666       | 4.48E-07 | 1.57E-05                       | Up-regulated            |
| <i>CELSR3</i> | Cadherin, EGF LAG seven-pass G-type receptor 3            | Homophilic cell adhesion via plasma membrane adhesion molecules                                                  | 2.031       | 3.61E-05 | 5.19E-04                       | Up-regulated            |
| <i>CENPA</i>  | Centromere protein A                                      | Protein localization to chromosome, centromeric region                                                           | 3.417       | 5.63E-07 | 1.84E-05                       | Up-regulated            |
| <i>CENPE</i>  | Centromere protein E, 312kDa                              | Antigen processing and presentation of exogenous peptide antigen via MHC class II                                | 3.006       | 4.88E-06 | 1.03E-04                       | Up-regulated            |
| <i>CENPF</i>  | Centromere protein F, 350/400kDa                          | Negative regulation of transcription, DNA-templated                                                              | 2.959       | 6.77E-06 | 1.35E-04                       | Up-regulated            |
| <i>CEP55</i>  | Centrosomal protein 55kDa                                 | Establishment of protein localization                                                                            | 3.098       | 2.71E-06 | 6.44E-05                       | Up-regulated            |
| <i>CERKL</i>  | Ceramide kinase-like                                      | Negative regulation of apoptotic process                                                                         | 2.374       | 8.82E-08 | 4.23E-06                       | Up-regulated            |
| <i>CHI3L1</i> | Chitinase 3-like 1 (cartilage glycoprotein-39)            | Positive regulation of peptidyl-threonine phosphorylation                                                        | 5.602       | 1.11E-17 | 1.10E-13                       | Up-regulated            |
| <i>CHI3L2</i> | Chitinase 3-like 2                                        | Carbohydrate metabolic process                                                                                   | 2.777       | 8.73E-06 | 1.66E-04                       | Up-regulated            |
| <i>CHIT1</i>  | Chitinase 1 (chitotriosidase)                             | Polysaccharide catabolic process                                                                                 | 4.887       | 6.77E-12 | 1.76E-09                       | Up-regulated            |
| <i>CKS2</i>   | CDC28 protein kinase regulatory subunit 2                 | Regulation of cyclin-dependent protein serine/threonine kinase activity                                          | 3.33        | 1.86E-08 | 1.20E-06                       | Up-regulated            |
| <i>CLDN19</i> | Claudin 19                                                | Calcium-independent cell-cell adhesion via plasma membrane cell-adhesion molecules                               | -2.28       | 3.53E-04 | 3.06E-03                       | Down-regulated          |
| <i>CLEC4A</i> | C-type lectin domain family 4 member A                    | Stimulatory C-type lectin receptor signaling pathway                                                             | 3.273       | 1.56E-11 | 3.40E-09                       | Up-regulated            |
| <i>CLEC4D</i> | C-type lectin domain family 4 member D                    | Stimulatory C-type lectin receptor signaling pathway                                                             | 4.201       | 8.63E-15 | 1.02E-11                       | Up-regulated            |
| <i>CLEC4E</i> | C-type lectin domain family 4 member E                    | Stimulatory C-type lectin receptor signaling pathway                                                             | 3.776       | 2.30E-17 | 1.15E-13                       | Up-regulated            |
| <i>CLEC9A</i> | C-type lectin domain family 9 member A                    | Positive regulation of cytokine secretion                                                                        | 2.474       | 1.53E-04 | 1.61E-03                       | Up-regulated            |
| <i>CLIP4</i>  | CAP-GLY domain containing linker protein family, member 4 | Negative regulation of T cell receptor signaling pathway                                                         | -2.572      | 6.89E-08 | 3.44E-06                       | Down-regulated          |

Continued on next page

**On-line Table 1: Continued**

| Gene Name      | Description                                                                           | Gene Main Function Determined by Gene Ontology                                                                                                                                              | Fold Change | P Value  | False Discovery Rate (q Value) | Direction of Expression |
|----------------|---------------------------------------------------------------------------------------|---------------------------------------------------------------------------------------------------------------------------------------------------------------------------------------------|-------------|----------|--------------------------------|-------------------------|
| <i>CLSTN2</i>  | Calsyntenin 2                                                                         | Homophilic cell adhesion via plasma membrane adhesion molecules                                                                                                                             | 4.223       | 2.43E-10 | 3.63E-08                       | Up-regulated            |
| <i>CNR2</i>    | Cannabinoid receptor 2 (macrophage)                                                   | G-protein coupled receptor signaling pathway, coupled to cyclic nucleotide second messenger                                                                                                 | 2.199       | 3.56E-04 | 3.08E-03                       | Up-regulated            |
| <i>COCH</i>    | Cochlin                                                                               | Positive regulation of innate immune response                                                                                                                                               | 2.861       | 4.37E-08 | 2.44E-06                       | Up-regulated            |
| <i>CPA5</i>    | Carboxypeptidase A5                                                                   | Metalloprotease activity                                                                                                                                                                    | 3.777       | 2.89E-14 | 2.14E-11                       | Up-regulated            |
| <i>CPPEDI</i>  | Calcineurin-like phosphoesterase domain containing 1                                  | Phosphoprotein phosphatase activity                                                                                                                                                         | 2.068       | 9.46E-13 | 3.63E-10                       | Up-regulated            |
| <i>CPVL</i>    | Carboxypeptidase, vitellogenic-like                                                   | Serine-type carboxypeptidase activity                                                                                                                                                       | 2.233       | 1.14E-06 | 3.17E-05                       | Up-regulated            |
| <i>CSF2RB</i>  | Colony stimulating factor 2 receptor, $\beta$ , low-affinity (granulocyte-macrophage) | Granulocyte macrophage colony-stimulating factor receptor complex                                                                                                                           | 2.367       | 3.05E-06 | 7.14E-05                       | Up-regulated            |
| <i>CTSB</i>    | Cathepsin B                                                                           | Proteolysis involved in cellular protein catabolic process                                                                                                                                  | 2.15        | 1.77E-08 | 1.15E-06                       | Up-regulated            |
| <i>CTSE</i>    | Cathepsin E                                                                           | Antigen processing and presentation of exogenous peptide antigen via <i>MHC</i> class II                                                                                                    | 4.164       | 2.35E-14 | 2.14E-11                       | Up-regulated            |
| <i>CTSS</i>    | Cathepsin S                                                                           | Antigen processing and presentation of exogenous peptide antigen via <i>MHC</i> class I, <i>TAP</i> -independent                                                                            | 2.432       | 2.67E-09 | 2.51E-07                       | Up-regulated            |
| <i>CTSV</i>    | Cathepsin V                                                                           | Antigen processing and presentation of exogenous peptide antigen via <i>MHC</i> class II                                                                                                    | 2.803       | 3.38E-11 | 6.49E-09                       | Up-regulated            |
| <i>CXCL11</i>  | Chemokine (C-X-C motif) ligand 11                                                     | Positive regulation of release of sequestered calcium ion into cytosol                                                                                                                      | 2.203       | 2.11E-05 | 3.43E-04                       | Up-regulated            |
| <i>CXCL13</i>  | Chemokine (C-X-C motif) ligand 13                                                     | Negative regulation of endothelial cell chemotaxis to fibroblast growth factor                                                                                                              | 6.286       | 9.57E-14 | 4.78E-11                       | Up-regulated            |
| <i>CXCL13</i>  | Chemokine (C-X-C motif) ligand 13                                                     | Negative regulation of endothelial cell chemotaxis to fibroblast growth factor                                                                                                              | 2.92        | 1.34E-06 | 3.67E-05                       | Up-regulated            |
| <i>CXCL13</i>  | Chemokine (C-X-C motif) ligand 13                                                     | Negative regulation of endothelial cell chemotaxis to fibroblast growth factor                                                                                                              | 2.471       | 3.65E-06 | 8.11E-05                       | Up-regulated            |
| <i>CXCL13</i>  | Chemokine (C-X-C motif) ligand 13                                                     | Negative regulation of endothelial cell chemotaxis to fibroblast growth factor                                                                                                              | 6.49        | 5.49E-09 | 4.53E-07                       | Up-regulated            |
| <i>CXCL8</i>   | Chemokine (C-X-C motif) ligand 8                                                      | Regulation of single-stranded viral RNA replication via double-stranded DNA intermediate                                                                                                    | 5.463       | 2.09E-10 | 3.21E-08                       | Up-regulated            |
| <i>CXCR4</i>   | Chemokine (C-X-C motif) receptor 4                                                    | Positive regulation of cytosolic calcium ion concentration                                                                                                                                  | 3.211       | 9.02E-10 | 1.01E-07                       | Up-regulated            |
| <i>CYBB</i>    | Cytochrome b-245 $\beta$ polypeptide                                                  | Antigen processing and presentation of exogenous peptide antigen via <i>MHC</i> class I, <i>TAP</i> -dependent                                                                              | 2.643       | 3.20E-09 | 2.95E-07                       | Up-regulated            |
| <i>CYP2D6</i>  | Cytochrome P450, family 2 subfamily D, polypeptide 6                                  | Oxidoreductase activity, acting on paired donors, with incorporation or reduction of molecular oxygen, reduced flavin or flavoprotein as one donor, and incorporation of one atom of oxygen | -2.991      | 4.23E-06 | 9.28E-05                       | Down-regulated          |
| <i>DAPL1</i>   | Death associated protein-like 1                                                       | Cellular response to amino acid starvation                                                                                                                                                  | -3.922      | 2.45E-12 | 7.41E-10                       | Down-regulated          |
| <i>DCHS2</i>   | Dachsous cadherin-related 2                                                           | Homophilic cell adhesion via plasma membrane adhesion molecules                                                                                                                             | -2.599      | 3.27E-08 | 1.89E-06                       | Down-regulated          |
| <i>DCSTAMP</i> | Dendrocyte expressed seven transmembrane protein                                      | Cellular response to macrophage colony-stimulating factor stimulus                                                                                                                          | 5.363       | 3.91E-10 | 5.43E-08                       | Up-regulated            |
| <i>DDIAS</i>   | DNA damage-induced apoptosis suppressor                                               | Negative regulation of fibroblast apoptotic process                                                                                                                                         | 2.475       | 4.89E-07 | 1.67E-05                       | Up-regulated            |
| <i>DEPDC1B</i> | DEP domain containing 1B                                                              | Regulation of small GTPase mediated signal transduction                                                                                                                                     | 2.134       | 7.09E-05 | 8.74E-04                       | Up-regulated            |
| <i>DHRS9</i>   | Dehydrogenase/reductase (SDR family) member 9                                         | Integral component of endoplasmic reticulum membrane                                                                                                                                        | 3.533       | 1.41E-09 | 1.45E-07                       | Up-regulated            |
| <i>DKK3</i>    | Dickkopf WNT signaling pathway inhibitor 3                                            | Negative regulation of aldosterone biosynthetic process                                                                                                                                     | -2.125      | 2.65E-09 | 2.51E-07                       | Down-regulated          |
| <i>DLGAP5</i>  | Discs, large ( <i>Drosophila</i> ) homolog-associated protein 5                       | Positive regulation of mitotic metaphase/anaphase transition                                                                                                                                | 3.329       | 9.92E-08 | 4.61E-06                       | Up-regulated            |
| <i>DOK3</i>    | Docking protein 3                                                                     | Ras protein signal transduction                                                                                                                                                             | 2.136       | 1.69E-06 | 4.41E-05                       | Up-regulated            |
| <i>DRP2</i>    | Dystrophin related protein 2                                                          | Nucleobase-containing compound metabolic process                                                                                                                                            | -2.492      | 8.65E-06 | 1.66E-04                       | Down-regulated          |
| <i>DSC2</i>    | Desmocollin 2                                                                         | Cell adhesive protein binding involved in bundle of His cell-Purkinje myocyte communication                                                                                                 | -2.182      | 1.46E-06 | 3.92E-05                       | Down-regulated          |
| <i>DSG2</i>    | Desmoglein 2                                                                          | Cell adhesive protein binding involved in bundle of His cell-Purkinje myocyte communication                                                                                                 | 3.073       | 5.42E-06 | 1.12E-04                       | Up-regulated            |
| <i>DSP</i>     | Desmoplakin                                                                           | Cell adhesive protein binding involved in bundle of His cell-Purkinje myocyte communication                                                                                                 | -2.382      | 5.40E-07 | 1.78E-05                       | Down-regulated          |
| <i>DUSP5</i>   | Dual specificity phosphatase 5                                                        | <i>MAP</i> kinase tyrosine/serine/threonine phosphatase activity                                                                                                                            | 2.151       | 1.84E-07 | 7.46E-06                       | Up-regulated            |
| <i>E2F1</i>    | E2F transcription factor 1                                                            | Positive regulation of protein insertion into mitochondrial membrane involved in apoptotic signaling pathway                                                                                | 2.147       | 3.23E-05 | 4.75E-04                       | Up-regulated            |
| <i>E2F8</i>    | E2F transcription factor 8                                                            | RNA polymerase II core promoter proximal region sequence-specific DNA binding transcription factor activity involved in negative regulation of transcription                                | 2.332       | 1.35E-04 | 1.46E-03                       | Up-regulated            |
| <i>ECT2</i>    | Epithelial cell transforming 2                                                        | Regulation of attachment of spindle microtubules to kinetochore                                                                                                                             | 3.077       | 7.67E-07 | 2.34E-05                       | Up-regulated            |

Continued on next page

**On-line Table 1: Continued**

| Gene Name      | Description                                                                | Gene Main Function Determined by Gene Ontology                                                                                                                                                    | Fold Change | P Value  | False Discovery Rate (q Value) | Direction of Expression |
|----------------|----------------------------------------------------------------------------|---------------------------------------------------------------------------------------------------------------------------------------------------------------------------------------------------|-------------|----------|--------------------------------|-------------------------|
| <i>EGLN3</i>   | Egl-9 family hypoxia-inducible factor 3                                    | Oxidoreductase activity, acting on paired donors, with incorporation or reduction of molecular oxygen, 2-oxoglutarate as one donor, and incorporation of one atom each of oxygen into both donors | 4.415       | 9.82E-12 | 2.39E-09                       | Up-regulated            |
| <i>EMILIN2</i> | Elastin microfibril interfacer 2                                           | Extracellular matrix constituent conferring elasticity                                                                                                                                            | 2.493       | 1.80E-08 | 1.17E-06                       | Up-regulated            |
| <i>ENO2</i>    | Enolase 2 ( $\gamma$ , neuronal)                                           | Phosphopyruvate hydratase activity                                                                                                                                                                | 3.632       | 9.22E-15 | 1.02E-11                       | Up-regulated            |
| <i>EPCAM</i>   | Epithelial cell adhesion molecule                                          | Positive regulation of transcription from RNA polymerase II promoter                                                                                                                              | 2.012       | 3.20E-06 | 7.36E-05                       | Up-regulated            |
| <i>EPHA6</i>   | EPH receptor A6                                                            | Integral component of plasma membrane                                                                                                                                                             | -2.681      | 6.10E-06 | 1.24E-04                       | Down-regulated          |
| <i>EPHX4</i>   | Epoxyde hydrolase 4                                                        | Integral component of membrane                                                                                                                                                                    | 2.876       | 4.31E-09 | 3.69E-07                       | Up-regulated            |
| <i>EPX</i>     | Eosinophil peroxidase                                                      | Negative regulation of interleukin-10 production                                                                                                                                                  | -2.128      | 3.95E-04 | 3.34E-03                       | Down-regulated          |
| <i>ERBB3</i>   | Erb-b2 receptor tyrosine kinase 3                                          | Transmembrane receptor protein tyrosine kinase signaling pathway                                                                                                                                  | -2.192      | 2.01E-07 | 8.09E-06                       | Down-regulated          |
| <i>ERCC6 L</i> | Excision repair cross-complementation group 6-like                         | Small GTPase mediated signal transduction                                                                                                                                                         | 2.505       | 1.37E-05 | 2.41E-04                       | Up-regulated            |
| <i>ERO1 L</i>  | ERO1-like (S. Cerevisiae)                                                  | Oxidoreductase activity, acting on a sulfur group of donors, disulfide as acceptor                                                                                                                | 2.47        | 7.94E-11 | 1.37E-08                       | Up-regulated            |
| <i>ESCO2</i>   | Establishment of sister chromatid cohesion N-acetyltransferase 2           | Lysine N-acetyltransferase activity, acting on acetyl phosphate as donor                                                                                                                          | 2.366       | 3.58E-04 | 3.09E-03                       | Up-regulated            |
| <i>ETV4</i>    | Ets variant 4                                                              | RNA polymerase II core promoter proximal region sequence-specific DNA binding transcription factor activity involved in positive regulation of transcription                                      | 2.198       | 5.31E-05 | 6.91E-04                       | Up-regulated            |
| <i>EVI2B</i>   | Ecotropic viral integration site 2B                                        | Integral component of plasma membrane                                                                                                                                                             | 2.132       | 7.67E-07 | 2.34E-05                       | Up-regulated            |
| <i>EXO1</i>    | Exonuclease 1                                                              | Humoral immune response mediated by circulating immunoglobulin                                                                                                                                    | 2.993       | 3.09E-06 | 7.19E-05                       | Up-regulated            |
| <i>F3</i>      | Coagulation factor III (thromboplastin, tissue factor)                     | Activation of cysteine-type endopeptidase activity involved in apoptotic process                                                                                                                  | -2.058      | 1.09E-08 | 7.74E-07                       | Down-regulated          |
| <i>FABP5</i>   | Fatty acid binding protein 5 (psoriasis-associated)                        | Phosphatidylcholine biosynthetic process                                                                                                                                                          | 3.9         | 6.86E-14 | 4.02E-11                       | Up-regulated            |
| <i>FADS1</i>   | Fatty acid desaturase 1                                                    | Unsaturated fatty acid biosynthetic process                                                                                                                                                       | 2.073       | 1.37E-04 | 1.47E-03                       | Up-regulated            |
| <i>FADS1</i>   | Fatty acid desaturase 1                                                    | Unsaturated fatty acid biosynthetic process                                                                                                                                                       | 2.138       | 3.32E-06 | 7.55E-05                       | Up-regulated            |
| <i>FAIM2</i>   | Fas apoptotic inhibitory molecule 2                                        | Negative regulation of apoptotic signaling pathway                                                                                                                                                | 2.91        | 9.48E-04 | 6.85E-03                       | Up-regulated            |
| <i>FAIM3</i>   | Fas apoptotic inhibitory molecule 3                                        | Negative regulation of apoptotic process                                                                                                                                                          | 2.952       | 2.35E-04 | 2.25E-03                       | Up-regulated            |
| <i>FAM150A</i> | Family with sequence similarity 150, member A                              | Extracellular region                                                                                                                                                                              | -2.532      | 3.46E-05 | 5.01E-04                       | Down-regulated          |
| <i>FAM46C</i>  | Family with sequence similarity 46, member C                               | Protein binding                                                                                                                                                                                   | 2.024       | 1.25E-05 | 2.22E-04                       | Up-regulated            |
| <i>FBP1</i>    | Fructose-16-bisphosphatase 1                                               | Negative regulation of Ras protein signal transduction                                                                                                                                            | 2.021       | 3.45E-04 | 3.02E-03                       | Up-regulated            |
| <i>FCRL1</i>   | Fc receptor-like 1                                                         | Integral component of membrane                                                                                                                                                                    | 3.566       | 2.64E-04 | 2.46E-03                       | Up-regulated            |
| <i>FCRL3</i>   | Fc receptor-like 3                                                         | Integral component of membrane                                                                                                                                                                    | 2.054       | 5.07E-05 | 6.66E-04                       | Up-regulated            |
| <i>FCRLA</i>   | Fc receptor-like A                                                         | Cell differentiation                                                                                                                                                                              | 3.344       | 2.09E-04 | 2.06E-03                       | Up-regulated            |
| <i>FGF23</i>   | Fibroblast growth factor 23                                                | Positive regulation of MAPKKK cascade by fibroblast growth factor receptor signaling pathway                                                                                                      | 7.423       | 9.83E-12 | 2.39E-09                       | Up-regulated            |
| <i>FGF7</i>    | Fibroblast growth factor 7                                                 | Regulation of branching involved in salivary gland morphogenesis by mesenchymal-epithelial signaling                                                                                              | 2.551       | 3.25E-08 | 1.89E-06                       | Up-regulated            |
| <i>FGL1</i>    | Fibrinogen-like 1                                                          | Extracellular exosome                                                                                                                                                                             | 3.707       | 4.16E-06 | 9.14E-05                       | Up-regulated            |
| <i>FLVCR2</i>  | Feline leukemia virus subgroup C cellular receptor family, member 2        | Integral component of membrane                                                                                                                                                                    | 2.29        | 2.52E-06 | 6.03E-05                       | Up-regulated            |
| <i>FMN1</i>    | Formin 1                                                                   | Microtubule binding                                                                                                                                                                               | 2.028       | 1.43E-05 | 2.50E-04                       | Up-regulated            |
| <i>FNTB</i>    | Farnesyltransferase, CAAX box, $\beta$                                     | Positive regulation of nitric-oxide synthase biosynthetic process                                                                                                                                 | 2.317       | 7.65E-14 | 4.02E-11                       | Up-regulated            |
| <i>FOLR2</i>   | Folate receptor 2 (fetal)                                                  | Regulation of thymidylate synthase biosynthetic process                                                                                                                                           | 2.325       | 7.52E-06 | 1.48E-04                       | Up-regulated            |
| <i>FOXM1</i>   | Forkhead box M1                                                            | DNA damage response, signal transduction by p53 class mediator resulting in transcription of p21 class mediator                                                                                   | 2.688       | 9.37E-06 | 1.77E-04                       | Up-regulated            |
| <i>FRMPD1</i>  | FERM and PDZ domain containing 1                                           | Extracellular exosome                                                                                                                                                                             | -2.298      | 9.03E-08 | 4.27E-06                       | Down-regulated          |
| <i>FRRS1</i>   | Ferric-chelate reductase 1                                                 | Ferric-chelate reductase activity                                                                                                                                                                 | 2.436       | 5.53E-08 | 2.83E-06                       | Up-regulated            |
| <i>FTL</i>     | Ferritin, light polypeptide                                                | Post-Golgi vesicle-mediated transport                                                                                                                                                             | 3.393       | 4.20E-10 | 5.66E-08                       | Up-regulated            |
| <i>GALNT6</i>  | Polypeptide N-acetylgalactosaminyltransferase 6                            | Polypeptide N-acetylgalactosaminyltransferase activity                                                                                                                                            | 3.685       | 5.19E-10 | 6.39E-08                       | Up-regulated            |
| <i>GAPT</i>    | GRB2-binding adaptor protein, transmembrane                                | Immunoglobulin production involved in immunoglobulin mediated immune response                                                                                                                     | 2.689       | 6.80E-04 | 5.21E-03                       | Up-regulated            |
| <i>GGH</i>     | $\gamma$ -glutamyl hydrolase (conjugase, foylpolylgammaglutamyl hydrolase) | $\gamma$ -glutamyl-peptidase activity                                                                                                                                                             | 2.62        | 4.43E-08 | 2.44E-06                       | Up-regulated            |
| <i>GLRX</i>    | Glutaredoxin (thioltransferase)                                            | Positive regulation of sodium ion transmembrane transporter activity                                                                                                                              | 2.955       | 1.78E-06 | 4.55E-05                       | Up-regulated            |
| <i>GPD1</i>    | Glycerol-3-phosphate dehydrogenase 1 (soluble)                             | Glycerol-3-phosphate dehydrogenase (NAD <sup>+</sup> ) activity                                                                                                                                   | -2.568      | 1.08E-07 | 4.93E-06                       | Down-regulated          |
| <i>GPI</i>     | Glucose-6-phosphate isomerase                                              | Negative regulation of cysteine-type endopeptidase activity involved in apoptotic process                                                                                                         | 2.093       | 1.12E-09 | 1.19E-07                       | Up-regulated            |
| <i>GPNMB</i>   | Glycoprotein (transmembrane) nmb                                           | Negative regulation of tumor necrosis factor production                                                                                                                                           | 2.746       | 2.32E-06 | 5.66E-05                       | Up-regulated            |

Continued on next page

**On-line Table 1: Continued**

| Gene Name       | Description                                                    | Gene Main Function Determined by Gene Ontology                                                                                                                 | Fold Change | P Value  | False Discovery Rate (q Value) | Direction of Expression |
|-----------------|----------------------------------------------------------------|----------------------------------------------------------------------------------------------------------------------------------------------------------------|-------------|----------|--------------------------------|-------------------------|
| <i>GPR158</i>   | G protein-coupled receptor 158                                 | Regulation of G-protein coupled receptor protein signaling pathway                                                                                             | 5.884       | 1.27E-09 | 1.34E-07                       | Up-regulated            |
| <i>GPR171</i>   | G protein-coupled receptor 171                                 | G-protein coupled purinergic nucleotide receptor signaling pathway                                                                                             | 2.211       | 1.56E-04 | 1.63E-03                       | Up-regulated            |
| <i>GPR18</i>    | G protein-coupled receptor 18                                  | G-protein coupled receptor signaling pathway                                                                                                                   | 3.07        | 7.58E-09 | 5.83E-07                       | Up-regulated            |
| <i>GPR84</i>    | G protein-coupled receptor 84                                  | Phospholipase C-activating G-protein coupled receptor signaling pathway                                                                                        | 3.628       | 2.07E-05 | 3.37E-04                       | Up-regulated            |
| <i>GPRC5D</i>   | G protein-coupled receptor, class C, group 5 member D          | G-protein coupled receptor signaling pathway                                                                                                                   | 2.051       | 1.16E-03 | 8.03E-03                       | Up-regulated            |
| <i>GPRIN3</i>   | GPRIN family member 3                                          | Unknown                                                                                                                                                        | 2.444       | 6.77E-05 | 8.40E-04                       | Up-regulated            |
| <i>GSG2</i>     | Germ cell associated 2 (haspin)                                | Histone H3-T3 phosphorylation involved in chromosome passenger complex localization to kinetochore                                                             | 2.477       | 1.71E-04 | 1.77E-03                       | Up-regulated            |
| <i>GTF3C6</i>   | General transcription factor IIC, polypeptide 6 $\alpha$ 35kDa | 5S class ribosomal RNA transcription from RNA polymerase III type 1 promoter                                                                                   | 4.617       | 6.18E-13 | 2.57E-10                       | Up-regulated            |
| <i>HAAO</i>     | 3-hydroxyanthranilate 3,4-dioxygenase                          | "De novo" NAD biosynthetic process from tryptophan                                                                                                             | 2.565       | 3.85E-07 | 1.40E-05                       | Up-regulated            |
| <i>HAS2</i>     | Hyaluronan synthase 2                                          | Positive regulation of substrate adhesion-dependent cell spreading                                                                                             | 2.676       | 3.13E-11 | 6.24E-09                       | Up-regulated            |
| <i>HAVCR1</i>   | Hepatitis A virus cellular receptor 1                          | Integral component of membrane                                                                                                                                 | 2.297       | 3.83E-05 | 5.43E-04                       | Up-regulated            |
| <i>HCK</i>      | HCK proto-oncogene, Src family tyrosine kinase                 | Regulation of sequence-specific DNA binding transcription factor activity                                                                                      | 2.154       | 6.94E-07 | 2.20E-05                       | Up-regulated            |
| <i>HELLS</i>    | Helicase, lymphoid-specific                                    | Methylation-dependent chromatin silencing                                                                                                                      | 2.417       | 1.22E-07 | 5.38E-06                       | Up-regulated            |
| <i>HHIP</i>     | Hedgehog interacting protein                                   | Oxidoreductase activity, acting on the CH-OH group of donors, quinone or similar compound as acceptor                                                          | -3.512      | 4.82E-15 | 6.88E-12                       | Down-regulated          |
| <i>HILSI</i>    | Histone linker H1 domain, spermatid-specific 1 pseudogene      | Regulation of transcription, DNA-templated                                                                                                                     | 2.327       | 4.35E-05 | 5.95E-04                       | Up-regulated            |
| <i>HK3</i>      | Hexokinase 3 (white cell)                                      | Early endosome to late endosome transport                                                                                                                      | 2.099       | 4.66E-05 | 6.27E-04                       | Up-regulated            |
| <i>HLA-DRA</i>  | Major histocompatibility complex, class II, DR $\alpha$        | Antigen processing and presentation of peptide or polysaccharide antigen via MHC class II                                                                      | 2.073       | 2.53E-08 | 1.52E-06                       | Up-regulated            |
| <i>HMGA2</i>    | High mobility group AT-hook 2                                  | RNA polymerase II core promoter proximal region sequence-specific DNA binding transcription factor activity involved in negative regulation of transcription   | 3.322       | 7.53E-09 | 5.83E-07                       | Up-regulated            |
| <i>HMMR</i>     | Hyaluronan-mediated motility receptor (RHAMM)                  | Glycosaminoglycan metabolic process                                                                                                                            | 3.965       | 1.21E-08 | 8.43E-07                       | Up-regulated            |
| <i>HMOX1</i>    | Heme oxygenase 1                                               | Regulation of transcription from RNA polymerase II promoter in response to oxidative stress                                                                    | 4.416       | 5.12E-08 | 2.69E-06                       | Up-regulated            |
| <i>HNMT</i>     | Histamine N-methyltransferase                                  | Positive regulation of protein targeting to mitochondrion                                                                                                      | 2.28        | 4.04E-10 | 5.53E-08                       | Up-regulated            |
| <i>HOOK1</i>    | Hook microtubule-tethering protein 1                           | Early endosome to late endosome transport                                                                                                                      | 2.098       | 3.70E-04 | 3.17E-03                       | Up-regulated            |
| <i>HRHI</i>     | Histamine receptor H1                                          | Positive regulation of adenylate cyclase activity involved in G-protein coupled receptor signaling pathway                                                     | -2.394      | 7.10E-07 | 2.23E-05                       | Down-regulated          |
| <i>HS3ST3B1</i> | Heparan sulfate (glucosamine) 3-O-sulfotransferase 3B1         | Heparan sulfate proteoglycan biosynthetic process, enzymatic modification                                                                                      | 2.026       | 1.55E-04 | 1.63E-03                       | Up-regulated            |
| <i>HSPB3</i>    | Heat shock 27kDa protein 3                                     | Response to unfolded protein                                                                                                                                   | 2.298       | 2.42E-04 | 2.31E-03                       | Up-regulated            |
| <i>IBSP</i>     | Integrin-binding sialoprotein                                  | Cellular response to growth factor stimulus                                                                                                                    | 6.221       | 6.88E-12 | 1.76E-09                       | Up-regulated            |
| <i>ICOS</i>     | Inducible T-cell co-stimulator                                 | Integral component of plasma membrane                                                                                                                          | 2.105       | 8.52E-05 | 1.01E-03                       | Up-regulated            |
| <i>IGF2BP3</i>  | Insulin-like growth factor 2 mRNA binding protein 3            | Regulation of cytokine biosynthetic process                                                                                                                    | 2.684       | 6.51E-06 | 1.31E-04                       | Up-regulated            |
| <i>IGHV3-23</i> | Immunoglobulin heavy variable 3-23                             | Fc- $\gamma$ receptor signaling pathway involved in phagocytosis                                                                                               | 2.1         | 6.12E-06 | 1.24E-04                       | Up-regulated            |
| <i>IGHV3-23</i> | Immunoglobulin heavy variable 3-23                             | Fc- $\gamma$ receptor signaling pathway involved in phagocytosis                                                                                               | 2.326       | 6.85E-07 | 2.18E-05                       | Up-regulated            |
| <i>IGSF6</i>    | Immunoglobulin superfamily, member 6                           | Transmembrane signaling receptor activity                                                                                                                      | 3.615       | 4.48E-14 | 2.80E-11                       | Up-regulated            |
| <i>IKZF3</i>    | IKAROS family zinc finger 3 (Aiolos)                           | RNA polymerase II transcription regulatory region sequence-specific DNA binding transcription factor activity involved in positive regulation of transcription | 2.782       | 1.22E-05 | 2.19E-04                       | Up-regulated            |
| <i>IL10</i>     | Interleukin 10                                                 | Positive regulation of sequence-specific DNA binding transcription factor activity                                                                             | 2.12        | 4.41E-05 | 6.01E-04                       | Up-regulated            |
| <i>IL18BP</i>   | Interleukin 18 binding protein                                 | Extracellular negative regulation of signal transduction                                                                                                       | 2.181       | 2.81E-13 | 1.28E-10                       | Up-regulated            |
| <i>IL18R1</i>   | Interleukin 18 receptor 1                                      | Positive regulation of nuclear factor- $\kappa$ B import into nucleus                                                                                          | 2.517       | 1.18E-05 | 2.13E-04                       | Up-regulated            |
| <i>IL18RAP</i>  | Interleukin 18 receptor accessory protein                      | Cell surface receptor signaling pathway                                                                                                                        | 2.351       | 4.44E-04 | 3.67E-03                       | Up-regulated            |
| <i>IL1B</i>     | Interleukin 1 $\beta$                                          | Positive regulation of vascular endothelial growth factor receptor signaling pathway                                                                           | 3.209       | 7.84E-06 | 1.53E-04                       | Up-regulated            |
| <i>IL1RAP</i>   | Interleukin 1 receptor accessory protein                       | Integral component of plasma membrane                                                                                                                          | 2.577       | 4.25E-10 | 5.66E-08                       | Up-regulated            |
| <i>IL1RN</i>    | Interleukin 1 receptor antagonist                              | Negative regulation of interleukin-1-mediated signaling pathway                                                                                                | 3.248       | 4.45E-08 | 2.44E-06                       | Up-regulated            |
| <i>IL23A</i>    | Interleukin 23 $\alpha$ subunit p19                            | Positive regulation of granulocyte macrophage colony-stimulating factor production                                                                             | 3.604       | 1.63E-07 | 6.82E-06                       | Up-regulated            |
| <i>IL2RG</i>    | Interleukin 2 receptor, $\gamma$                               | Interleukin-2-mediated signaling pathway                                                                                                                       | 2.185       | 6.27E-06 | 1.27E-04                       | Up-regulated            |

Continued on next page

On-line Table 1: Continued

| Gene Name             | Description                                                                | Gene Main Function Determined by Gene Ontology                                                                                        | Fold Change | P Value  | False Discovery Rate (q Value) | Direction of Expression |
|-----------------------|----------------------------------------------------------------------------|---------------------------------------------------------------------------------------------------------------------------------------|-------------|----------|--------------------------------|-------------------------|
| <i>IL6</i>            | Interleukin 6                                                              | Negative regulation of cysteine-type endopeptidase activity involved in apoptotic process                                             | 3.778       | 6.67E-09 | 5.25E-07                       | Up-regulated            |
| <i>IL7R</i>           | Interleukin 7 receptor                                                     | Positive regulation of T cell differentiation in thymus                                                                               | 3.702       | 2.60E-16 | 6.79E-13                       | Up-regulated            |
| <i>INHBB</i>          | Inhibin, $\beta$ B                                                         | Positive regulation of pathway-restricted SMAD protein phosphorylation                                                                | 3.305       | 2.28E-09 | 2.21E-07                       | Up-regulated            |
| <i>IRG1</i>           | Immunoresponsive 1 homolog (mouse)                                         | Positive regulation of reactive oxygen species metabolic process                                                                      | 4.375       | 1.11E-10 | 1.84E-08                       | Up-regulated            |
| <i>ITGA4</i>          | Integrin, $\alpha$ 4 (antigen CD49D, $\alpha$ 4 subunit of VLA-4 receptor) | Heterophilic cell-cell adhesion via plasma membrane cell adhesion molecules                                                           | 2.695       | 2.87E-08 | 1.70E-06                       | Up-regulated            |
| <i>JCHAIN</i>         | Joining chain of multimeric IgA and IgM                                    | Positive regulation of protein oligomerization                                                                                        | 5.132       | 1.42E-08 | 9.55E-07                       | Up-regulated            |
| <i>KANK4</i>          | KN motif and ankyrin repeat domains 4                                      | Cytoplasm                                                                                                                             | -2.066      | 2.45E-04 | 2.32E-03                       | Down-regulated          |
| <i>KCNIPI</i>         | Kv channel interacting protein 1                                           | Extrinsic component of cytoplasmic side of plasma membrane                                                                            | 2.307       | 1.78E-05 | 2.97E-04                       | Up-regulated            |
| <i>KIAA0101</i>       | Kiaa0101                                                                   | Cellular response to DNA damage stimulus                                                                                              | 3.592       | 1.28E-08 | 8.82E-07                       | Up-regulated            |
| <i>KIAA1598</i>       | Kiaa1598                                                                   | Regulation of establishment of cell polarity                                                                                          | 2.119       | 2.43E-08 | 1.49E-06                       | Up-regulated            |
| <i>KIF11</i>          | Kinesin family member 11                                                   | Antigen processing and presentation of exogenous peptide antigen via MHC class II                                                     | 2.931       | 3.70E-06 | 8.21E-05                       | Up-regulated            |
| <i>KIF14</i>          | Kinesin family member 14                                                   | SCF-dependent proteasomal ubiquitin-dependent protein catabolic process                                                               | 2.541       | 4.87E-08 | 2.60E-06                       | Up-regulated            |
| <i>KIF18B</i>         | Kinesin family member 18B                                                  | ATP-dependent microtubule motor activity, plus-end-directed                                                                           | 2.962       | 8.08E-07 | 2.44E-05                       | Up-regulated            |
| <i>KIF20A</i>         | Kinesin family member 20A                                                  | Cell separation after cytokinesis                                                                                                     | 2.58        | 2.09E-07 | 8.27E-06                       | Up-regulated            |
| <i>KIF24</i>          | Kinesin family member 24                                                   | Microtubule depolymerization                                                                                                          | 2.502       | 6.33E-07 | 2.03E-05                       | Up-regulated            |
| <i>KIF1C1</i>         | Kinesin family member C1                                                   | ATP-dependent microtubule motor activity, minus-end-directed                                                                          | 2.352       | 2.03E-07 | 8.10E-06                       | Up-regulated            |
| <i>KLC1</i>           | Kinesin light chain 1                                                      | Antigen processing and presentation of exogenous peptide antigen via MHC class II                                                     | 2.125       | 1.35E-04 | 1.46E-03                       | Up-regulated            |
| <i>KLC1</i>           | Kinesin light chain 1                                                      | Antigen processing and presentation of exogenous peptide antigen via MHC class II                                                     | 2.618       | 3.36E-05 | 4.90E-04                       | Up-regulated            |
| <i>KLHL6</i>          | Kelch-like family member 6                                                 | Cu3-RING ubiquitin ligase complex                                                                                                     | 2.582       | 5.48E-10 | 6.59E-08                       | Up-regulated            |
| <i>KRT32</i>          | Keratin 32 type I                                                          | Structural molecule activity                                                                                                          | 2.387       | 8.07E-05 | 9.72E-04                       | Up-regulated            |
| <i>KRT8</i>           | Keratin 8 type II                                                          | Cell differentiation involved in embryonic placenta development                                                                       | 2.138       | 1.14E-03 | 7.92E-03                       | Up-regulated            |
| <i>LANCL3</i>         | Lanc lantibiotic synthetase component C-like 3 (bacterial)                 | Catalytic activity                                                                                                                    | 2.389       | 4.00E-05 | 5.63E-04                       | Up-regulated            |
| <i>LAT</i>            | Linker for activation of T cells                                           | Nuclear origin of replication recognition complex                                                                                     | 2.113       | 3.19E-06 | 7.36E-05                       | Up-regulated            |
| <i>LCPI</i>           | Lymphocyte cytosolic protein 1 (L-plastin)                                 | Regulation of intracellular protein transport                                                                                         | 2.276       | 6.00E-08 | 3.03E-06                       | Up-regulated            |
| <i>LECT1</i>          | Leukocyte cell derived chemotaxin 1                                        | Negative regulation of vascular endothelial growth factor receptor signaling pathway                                                  | -2.176      | 2.26E-04 | 2.18E-03                       | Down-regulated          |
| <i>LEP</i>            | Leptin                                                                     | Positive regulation of peroxisome proliferator activated receptor signaling pathway                                                   | -2.371      | 1.20E-06 | 3.32E-05                       | Down-regulated          |
| <i>LGALS3</i>         | Lectin, galactoside-binding, soluble, 3                                    | Negative regulation of T-cell activation via T-cell receptor contact with antigen bound to MHC molecule on antigen presenting cell    | 3.583       | 2.72E-16 | 6.79E-13                       | Up-regulated            |
| <i>LGALS7/LGALS7B</i> | Lectin, galactoside-binding, soluble, 7                                    | Heterophilic cell-cell adhesion via plasma membrane cell adhesion molecules                                                           | 3.084       | 4.99E-06 | 1.05E-04                       | Up-regulated            |
| <i>LIPA</i>           | Lipase A, lysosomal acid, cholesterol esterase                             | Homeostasis of number of cells within a tissue                                                                                        | 3.589       | 1.78E-07 | 7.29E-06                       | Up-regulated            |
| <i>LIPA</i>           | Lipase A, lysosomal acid, cholesterol esterase                             | Homeostasis of number of cells within a tissue                                                                                        | 5.181       | 7.73E-10 | 8.98E-08                       | Up-regulated            |
| <i>LPAR3</i>          | Lysophosphatidic acid receptor 3                                           | Positive regulation of cytosolic calcium ion concentration involved in phospholipase C-activating G-protein coupled signaling pathway | 3.454       | 1.16E-07 | 5.23E-06                       | Up-regulated            |
| <i>LPCAT2</i>         | Lysophosphatidylcholine acyltransferase 2                                  | 1-alkylglycerophosphocholine O-acetyltransferase activity                                                                             | 2.074       | 3.12E-07 | 1.18E-05                       | Up-regulated            |
| <i>LPXN</i>           | Leupaxin                                                                   | Negative regulation of B cell receptor signaling pathway                                                                              | 2.25        | 2.29E-07 | 8.94E-06                       | Up-regulated            |
| <i>LTA</i>            | Lymphotoxin $\alpha$                                                       | Positive regulation of humoral immune response mediated by circulating immunoglobulin                                                 | 2.109       | 9.99E-05 | 1.14E-03                       | Up-regulated            |
| <i>LY86</i>           | Lymphocyte antigen 86                                                      | Positive regulation of lipopolysaccharide-mediated signaling pathway                                                                  | 2.762       | 2.16E-08 | 1.36E-06                       | Up-regulated            |
| <i>MAP3K19</i>        | Mitogen-activated protein kinase kinase kinase 19                          | Activation of protein kinase activity                                                                                                 | 7.854       | 1.13E-10 | 1.85E-08                       | Up-regulated            |
| <i>MAPK13</i>         | Mitogen-activated protein kinase 13                                        | Vascular endothelial growth factor receptor signaling pathway                                                                         | 2.389       | 3.92E-07 | 1.42E-05                       | Up-regulated            |
| <i>MBNL3</i>          | Muscleblind-like splicing regulator 3                                      | Negative regulation of myoblast differentiation                                                                                       | 2.542       | 6.87E-07 | 2.18E-05                       | Up-regulated            |
| <i>MC5R</i>           | Melanocortin 5 receptor                                                    | G-protein coupled receptor signaling pathway, coupled to cyclic nucleotide second messenger                                           | -2.426      | 1.31E-07 | 5.70E-06                       | Down-regulated          |
| <i>MCM8</i>           | Minichromosome maintenance complex component 8                             | Double-strand break repair via homologous recombination                                                                               | 2.144       | 2.69E-04 | 2.50E-03                       | Up-regulated            |
| <i>MCOLN2</i>         | Mucopolip 2                                                                | Calcium ion transmembrane transport                                                                                                   | 2.947       | 1.73E-07 | 7.15E-06                       | Up-regulated            |
| <i>MELK</i>           | Maternal embryonic leucine zipper kinase                                   | Intrinsic apoptotic signaling pathway in response to oxidative stress                                                                 | 3.825       | 6.19E-07 | 2.00E-05                       | Up-regulated            |

Continued on next page

**On-line Table 1: Continued**

| Gene Name      | Description                                                          | Gene Main Function Determined by Gene Ontology                                                                                                               | Fold Change | P Value  | False Discovery Rate (q Value) | Direction of Expression |
|----------------|----------------------------------------------------------------------|--------------------------------------------------------------------------------------------------------------------------------------------------------------|-------------|----------|--------------------------------|-------------------------|
| <i>MFSD8</i>   | Major facilitator superfamily domain containing 8                    | Substrate-specific transmembrane transporter activity                                                                                                        | 3.658       | 4.01E-14 | 2.67E-11                       | Up-regulated            |
| <i>MILR1</i>   | Mast cell immunoglobulin-like receptor 1                             | Negative regulation of mast cell activation                                                                                                                  | 2.481       | 8.78E-07 | 2.60E-05                       | Up-regulated            |
| <i>MLANA</i>   | Melan-A                                                              | Integral component of plasma membrane                                                                                                                        | 2.085       | 5.42E-05 | 7.01E-04                       | Up-regulated            |
| <i>MMP1</i>    | Matrix metalloproteinase 1                                           | Positive regulation of protein oligomerization                                                                                                               | 8.407       | 1.93E-10 | 3.06E-08                       | Up-regulated            |
| <i>MMP12</i>   | Matrix metalloproteinase 12                                          | Positive regulation of epithelial cell proliferation involved in wound healing                                                                               | 6.206       | 1.97E-10 | 3.07E-08                       | Up-regulated            |
| <i>MMP13</i>   | Matrix metalloproteinase 13                                          | Low-density lipoprotein particle receptor binding                                                                                                            | 7.201       | 6.86E-13 | 2.74E-10                       | Up-regulated            |
| <i>MMP3</i>    | Matrix metalloproteinase 3                                           | Negative regulation of hydrogen peroxide metabolic process                                                                                                   | 4.084       | 1.22E-05 | 2.19E-04                       | Up-regulated            |
| <i>MOGAT1</i>  | Monoacylglycerol O-acyltransferase 1                                 | 2-Acylglycerol O-acyltransferase activity                                                                                                                    | 2.101       | 3.32E-04 | 2.93E-03                       | Up-regulated            |
| <i>MPEG1</i>   | Macrophage expressed 1                                               | Integral component of membrane                                                                                                                               | 2.847       | 1.03E-06 | 2.95E-05                       | Up-regulated            |
| <i>MPZ</i>     | Myelin protein zero                                                  | Negative regulation of apoptotic process                                                                                                                     | -3.4        | 1.33E-09 | 1.38E-07                       | Down-regulated          |
| <i>MREG</i>    | Melanoregulin                                                        | Melanocyte differentiation                                                                                                                                   | 3.746       | 1.45E-15 | 2.42E-12                       | Up-regulated            |
| <i>MS4A1</i>   | Membrane-spanning 4-domains, subfamily A, member 1                   | Protein kinase C-activating G-protein coupled receptor signaling pathway                                                                                     | 4.07        | 4.19E-07 | 1.48E-05                       | Up-regulated            |
| <i>MSR1</i>    | Macrophage scavenger receptor 1                                      | Positive regulation of macrophage derived foam cell differentiation                                                                                          | 3.213       | 9.40E-09 | 6.86E-07                       | Up-regulated            |
| <i>MTFP1</i>   | Mitochondrial fission process 1                                      | Integral component of membrane                                                                                                                               | 3.372       | 1.06E-08 | 7.54E-07                       | Up-regulated            |
| <i>MTTP</i>    | Microsomal triglyceride transfer protein                             | Small molecule metabolic process                                                                                                                             | 2.753       | 1.49E-03 | 9.73E-03                       | Up-regulated            |
| <i>MYH7</i>    | Myosin, heavy chain 7, cardiac muscle, $\beta$                       | Regulation of slow-twitch skeletal muscle fiber contraction                                                                                                  | 4.158       | 1.24E-07 | 5.44E-06                       | Up-regulated            |
| <i>MYH7B</i>   | Myosin, heavy chain 7B, cardiac muscle, $\beta$                      | Metabolic process                                                                                                                                            | -3.342      | 1.79E-07 | 7.29E-06                       | Down-regulated          |
| <i>MYO1G</i>   | Myosin 1G                                                            | Fc- $\gamma$ receptor signaling pathway involved in phagocytosis                                                                                             | 2.815       | 1.66E-12 | 5.72E-10                       | Up-regulated            |
| <i>MYOZ2</i>   | Myozenin 2                                                           | Protein phosphatase 2B binding                                                                                                                               | -2.448      | 1.95E-05 | 3.22E-04                       | Down-regulated          |
| <i>MZB1</i>    | Marginal zone B and B1 cell-specific protein                         | Negative regulation of glucose import in response to insulin stimulus                                                                                        | 4.437       | 5.72E-08 | 2.91E-06                       | Up-regulated            |
| <i>NCAPG</i>   | Non-SMC condensin I complex, subunit G                               | Mitotic chromosome condensation                                                                                                                              | 2.443       | 3.72E-05 | 5.32E-04                       | Up-regulated            |
| <i>NCMAP</i>   | Noncompact myelin associated protein                                 | Peripheral nervous system myelin formation                                                                                                                   | -2.569      | 3.34E-06 | 7.58E-05                       | Down-regulated          |
| <i>NDUFA5</i>  | NADH dehydrogenase (ubiquinone) 1 $\alpha$ subcomplex, 5             | Mitochondrial electron transport, NADH to ubiquinone                                                                                                         | 2.865       | 2.17E-11 | 4.51E-09                       | Up-regulated            |
| <i>NEIL3</i>   | Nei endonuclease VIII-like 3 (E. coli)                               | DNA-(apurinic or apyrimidinic site) lyase activity                                                                                                           | 2.628       | 1.08E-03 | 7.61E-03                       | Up-regulated            |
| <i>NEK2</i>    | NIMA-related kinase 2                                                | Anaphase-promoting complex-dependent proteasomal ubiquitin-dependent protein catabolic process                                                               | 3.178       | 1.02E-07 | 4.71E-06                       | Up-regulated            |
| <i>NFASC</i>   | Neurofascin                                                          | Protein binding involved in heterotypic cell-cell adhesion                                                                                                   | -2.249      | 2.29E-04 | 2.21E-03                       | Down-regulated          |
| <i>NIPAL4</i>  | NIPA-like domain containing 4                                        | Magnesium ion transmembrane transporter activity                                                                                                             | -2.161      | 3.23E-05 | 4.75E-04                       | Down-regulated          |
| <i>NKAIN1</i>  | Na <sup>+</sup> /K <sup>+</sup> transporting ATPase interacting 1    | Regulation of sodium ion transport                                                                                                                           | 3.565       | 8.48E-09 | 6.42E-07                       | Up-regulated            |
| <i>NPM1</i>    | Nucleophosmin (nucleolar phosphoprotein B23 numatrin)                | Negative regulation of protein kinase activity by regulation of protein phosphorylation                                                                      | 3.607       | 8.01E-06 | 1.55E-04                       | Up-regulated            |
| <i>NUF2</i>    | NUF2 NDC80 kinetochore complex component                             | Small GTPase-mediated signal transduction                                                                                                                    | 3.212       | 7.47E-07 | 2.30E-05                       | Up-regulated            |
| <i>NYAP2</i>   | Neuronal tyrosine-phosphorylated phosphoinositide-3-kinase adaptor 2 | Phosphatidylinositol 3-kinase signaling                                                                                                                      | 2.779       | 2.43E-10 | 3.63E-08                       | Up-regulated            |
| <i>OGDHL</i>   | Oxoglutarate dehydrogenase-like                                      | Oxoglutarate dehydrogenase (succinyl-transferring) activity                                                                                                  | -2.099      | 1.15E-05 | 2.09E-04                       | Down-regulated          |
| <i>OVGP1</i>   | Oviductal glycoprotein 1 120kDa                                      | Negative regulation of binding of sperm to zona pellucida                                                                                                    | 2.855       | 8.14E-08 | 3.95E-06                       | Up-regulated            |
| <i>P2RX1</i>   | Purinergic receptor P2X, ligand gated ion channel, 1                 | Activation of cysteine-type endopeptidase activity involved in apoptotic process                                                                             | -2.211      | 1.94E-06 | 4.87E-05                       | Down-regulated          |
| <i>P2RY10</i>  | Purinergic receptor P2Y, G-protein coupled, 10                       | G-protein coupled purinergic nucleotide receptor signaling pathway                                                                                           | 2.564       | 4.54E-05 | 6.15E-04                       | Up-regulated            |
| <i>PARPBP</i>  | PARP1 binding protein                                                | Negative regulation of double-strand break repair via homologous recombination                                                                               | 2.383       | 2.57E-04 | 2.42E-03                       | Up-regulated            |
| <i>PAX5</i>    | Paired box 5                                                         | RNA polymerase II core promoter proximal region sequence-specific DNA binding transcription factor activity involved in positive regulation of transcription | 2.793       | 1.73E-05 | 2.91E-04                       | Up-regulated            |
| <i>PBK</i>     | PDZ binding kinase                                                   | Negative regulation of proteasomal ubiquitin-dependent protein catabolic process                                                                             | 2.934       | 3.12E-06 | 7.21E-05                       | Up-regulated            |
| <i>PCDHAC2</i> | Protocadherin $\alpha$ subfamily C, 2                                | Homophilic cell adhesion via plasma membrane adhesion molecules                                                                                              | -3.112      | 7.76E-11 | 1.36E-08                       | Down-regulated          |
| <i>PDE4B</i>   | Phosphodiesterase 4B, camp-specific                                  | Regulation of high voltage-gated calcium channel activity                                                                                                    | 2.299       | 1.45E-04 | 1.54E-03                       | Up-regulated            |
| <i>PDE6A</i>   | Phosphodiesterase 6A, camp-specific, rod, $\alpha$                   | Regulation of rhodopsin mediated signaling pathway                                                                                                           | 2.271       | 8.55E-06 | 1.64E-04                       | Up-regulated            |
| <i>PFKFB1</i>  | 6-phosphofructo-2-kinase/fructose-26-biphosphatase 1                 | 6-phosphofructo-2-kinase/fructose-26-biphosphatase complex                                                                                                   | -2.417      | 5.80E-07 | 1.89E-05                       | Down-regulated          |
| <i>PGBD5</i>   | PiggyBac transposable element derived 5                              | Integral component of membrane                                                                                                                               | 4.221       | 3.32E-11 | 6.49E-09                       | Up-regulated            |
| <i>PIGR</i>    | Polymeric immunoglobulin receptor                                    | Immunoglobulin transcytosis in epithelial cells mediated by polymeric immunoglobulin receptor                                                                | 3.309       | 1.73E-05 | 2.91E-04                       | Up-regulated            |
| <i>PIGR</i>    | Polymeric immunoglobulin receptor                                    | Immunoglobulin transcytosis in epithelial cells mediated by polymeric immunoglobulin receptor                                                                | 3.876       | 1.71E-06 | 4.41E-05                       | Up-regulated            |
| <i>PKIB</i>    | Protein kinase (camp-dependent, catalytic) inhibitor $\beta$         | Negative regulation of cyclin-dependent protein kinase activity                                                                                              | 2.442       | 4.66E-10 | 6.11E-08                       | Up-regulated            |

Continued on next page

**On-line Table 1: Continued**

| Gene Name       | Description                                                                           | Gene Main Function Determined by Gene Ontology                                                                                                               | Fold Change | P Value  | False Discovery Rate (q Value) | Direction of Expression |
|-----------------|---------------------------------------------------------------------------------------|--------------------------------------------------------------------------------------------------------------------------------------------------------------|-------------|----------|--------------------------------|-------------------------|
| <i>PLB1</i>     | Phospholipase B1                                                                      | Phosphatidylcholine acyl-chain remodeling                                                                                                                    | 2.755       | 4.24E-12 | 1.21E-09                       | Up-regulated            |
| <i>PLEK</i>     | Pleckstrin                                                                            | Negative regulation of G-protein coupled receptor protein signaling pathway                                                                                  | 2.5         | 1.54E-11 | 3.40E-09                       | Up-regulated            |
| <i>PLEKHMI</i>  | Pleckstrin homology domain containing, family M (with RUN domain) member 1            | Intracellular signal transduction                                                                                                                            | 2.181       | 2.35E-11 | 4.78E-09                       | Up-regulated            |
| <i>PLIN2</i>    | Perilipin 2                                                                           | Response to organic cyclic compound                                                                                                                          | 3.099       | 3.90E-09 | 3.42E-07                       | Up-regulated            |
| <i>PLP1</i>     | Proteolipid protein 1                                                                 | Long-chain fatty acid biosynthetic process                                                                                                                   | -2.244      | 3.60E-09 | 3.24E-07                       | Down-regulated          |
| <i>PLXNC1</i>   | Plexin C1                                                                             | Semaphorin-plexin signaling pathway                                                                                                                          | 2.155       | 3.79E-08 | 2.12E-06                       | Up-regulated            |
| <i>POU2AF1</i>  | POU class 2 associating factor 1                                                      | Transcription from RNA polymerase II promoter                                                                                                                | 4.23        | 1.89E-08 | 1.21E-06                       | Up-regulated            |
| <i>PRDMI</i>    | PR domain containing 1 with ZNF domain                                                | RNA polymerase II core promoter proximal region sequence-specific DNA binding transcription factor activity involved in negative regulation of transcription | 2.611       | 3.39E-08 | 1.94E-06                       | Up-regulated            |
| <i>PRND</i>     | Prion protein 2 (dublet)                                                              | Anchored component of membrane                                                                                                                               | 5.761       | 1.44E-08 | 9.56E-07                       | Up-regulated            |
| <i>PRR11</i>    | Proline rich 11                                                                       | Regulation of cell cycle                                                                                                                                     | 2.744       | 1.86E-05 | 3.10E-04                       | Up-regulated            |
| <i>PRTG</i>     | Protogenin                                                                            | Multicellular organismal development                                                                                                                         | 2.802       | 1.18E-07 | 5.27E-06                       | Up-regulated            |
| <i>PSG4</i>     | Pregnancy specific $\beta$ -1-glycoprotein 4                                          | Extracellular exosome                                                                                                                                        | 5.119       | 4.50E-05 | 6.11E-04                       | Up-regulated            |
| <i>PSG4</i>     | Pregnancy specific $\beta$ -1-glycoprotein 4                                          | Extracellular exosome                                                                                                                                        | 4.975       | 7.50E-08 | 3.69E-06                       | Up-regulated            |
| <i>PSG4</i>     | Pregnancy specific $\beta$ -1-glycoprotein 4                                          | Extracellular exosome                                                                                                                                        | 4.979       | 2.73E-08 | 1.62E-06                       | Up-regulated            |
| <i>PTGER3</i>   | Prostaglandin E receptor 3 (subtype EP3)                                              | Ligand-activated sequence-specific DNA binding RNA polymerase II transcription factor activity                                                               | -2.149      | 1.66E-07 | 6.90E-06                       | Down-regulated          |
| <i>PTGS2</i>    | Prostaglandin-endoperoxide synthase 2 (prostaglandin G/h synthase and cyclooxygenase) | Positive regulation of cell migration involved in sprouting angiogenesis                                                                                     | 2.685       | 1.78E-12 | 5.72E-10                       | Up-regulated            |
| <i>PTPN22</i>   | Protein tyrosine phosphatase, non-receptor type 22 (lymphoid)                         | Negative regulation of nucleotide-binding oligomerization domain containing 2 signaling pathway                                                              | 2.464       | 4.14E-07 | 1.47E-05                       | Up-regulated            |
| <i>PTPRC</i>    | Protein tyrosine phosphatase, receptor type, C                                        | Negative regulation of cell adhesion involved in substrate-bound cell migration                                                                              | 2.396       | 4.32E-09 | 3.69E-07                       | Up-regulated            |
| <i>PTPRO</i>    | Protein tyrosine phosphatase, receptor type, O                                        | Transmembrane receptor protein tyrosine phosphatase signaling pathway                                                                                        | 2.288       | 9.59E-09 | 6.94E-07                       | Up-regulated            |
| <i>PTX3</i>     | Pentraxin 3 long                                                                      | RNA polymerase II core promoter proximal region sequence-specific DNA binding transcription factor activity involved in positive regulation of transcription | 2.131       | 3.07E-06 | 7.16E-05                       | Up-regulated            |
| <i>PVR</i>      | Poliovirus receptor                                                                   | Positive regulation of natural killer cell mediated cytotoxicity directed against tumor cell target                                                          | 4.28        | 1.31E-07 | 5.70E-06                       | Up-regulated            |
| <i>PVR</i>      | Poliovirus receptor                                                                   | Positive regulation of natural killer cell mediated cytotoxicity directed against tumor cell target                                                          | 3.815       | 1.41E-12 | 5.21E-10                       | Up-regulated            |
| <i>RAB27B</i>   | RAB27B, member RAS oncogene family                                                    | Vesicle docking involved in exocytosis                                                                                                                       | -2.289      | 6.02E-05 | 7.63E-04                       | Down-regulated          |
| <i>RACGAP1</i>  | Rac GTPase activating protein 1                                                       | Antigen processing and presentation of exogenous peptide antigen via <i>MHC</i> class II                                                                     | 2.232       | 5.39E-06 | 1.12E-04                       | Up-regulated            |
| <i>RAD23A</i>   | RAD23 homolog A ( <i>S. Cerevisiae</i> )                                              | Regulation of proteasomal ubiquitin-dependent protein catabolic process                                                                                      | 4.195       | 8.31E-07 | 2.48E-05                       | Up-regulated            |
| <i>RAD51</i>    | <i>RAD51</i> recombinase                                                              | Replication-born double-strand break repair via sister chromatid exchange                                                                                    | 2.416       | 2.93E-05 | 4.40E-04                       | Up-regulated            |
| <i>RAD51AP1</i> | <i>RAD51</i> associated protein 1                                                     | Regulation of double-strand break repair via homologous recombination                                                                                        | 2.404       | 1.01E-05 | 1.88E-04                       | Up-regulated            |
| <i>RAD9A</i>    | RAD9 homolog A ( <i>S. Pombe</i> )                                                    | Positive regulation of intrinsic apoptotic signaling pathway in response to DNA damage                                                                       | 2.398       | 5.81E-04 | 4.60E-03                       | Up-regulated            |
| <i>RASSF6</i>   | Ras association (ralgds/AF-6) domain family member 6                                  | Positive regulation of apoptotic process                                                                                                                     | 3.185       | 4.90E-07 | 1.67E-05                       | Up-regulated            |
| <i>RBM47</i>    | RNA binding motif protein 47                                                          | Poly(A) RNA binding                                                                                                                                          | 2.039       | 7.37E-08 | 3.64E-06                       | Up-regulated            |
| <i>RGR</i>      | Retinal G protein coupled receptor                                                    | G-protein coupled receptor signaling pathway                                                                                                                 | 2.506       | 5.54E-07 | 1.82E-05                       | Up-regulated            |
| <i>RGS1</i>     | Regulator of G-protein signaling 1                                                    | Adenylate cyclase-inhibiting G-protein coupled receptor signaling pathway                                                                                    | 3.944       | 1.77E-12 | 5.72E-10                       | Up-regulated            |
| <i>RGS18</i>    | Regulator of G-protein signaling 18                                                   | Termination of G-protein coupled receptor signaling pathway                                                                                                  | 2.003       | 3.13E-05 | 4.62E-04                       | Up-regulated            |
| <i>RHOH</i>     | Ras homolog family member H                                                           | Negative regulation of I- $\kappa$ B kinase/nuclear factor- $\kappa$ B signaling                                                                             | 2.159       | 6.89E-04 | 5.27E-03                       | Up-regulated            |
| <i>RM12</i>     | Recq mediated genome instability 2                                                    | DNA replication                                                                                                                                              | 2.708       | 6.58E-06 | 1.32E-04                       | Up-regulated            |
| <i>RNF128</i>   | Ring finger protein 128 E3 ubiquitin protein ligase                                   | Protein ubiquitination involved in ubiquitin-dependent protein catabolic process                                                                             | 3.244       | 1.03E-11 | 2.45E-09                       | Up-regulated            |
| <i>RPS24</i>    | Ribosomal protein S24                                                                 | Maturation of <i>SSU</i> -rRNA from tricistronic rRNA transcript ( <i>SSU</i> -rRNA, 5.8S rRNA, <i>LSU</i> -rRNA)                                            | 2.617       | 1.10E-03 | 7.69E-03                       | Up-regulated            |
| <i>RSL1</i>     | Retinoschisin 1                                                                       | Phosphatidylinositol-345-trisphosphate binding                                                                                                               | 2.487       | 1.52E-04 | 1.61E-03                       | Up-regulated            |
| <i>RTN4RL2</i>  | Reticulon 4 receptor-like 2                                                           | Anchored component of plasma membrane                                                                                                                        | 4.082       | 3.00E-14 | 2.14E-11                       | Up-regulated            |
| <i>SI00A12</i>  | SI00 calcium binding protein A12                                                      | Positive regulation of nuclear factor- $\kappa$ B transcription factor activity                                                                              | 3.974       | 1.55E-05 | 2.68E-04                       | Up-regulated            |
| <i>SI00A8</i>   | SI00 calcium binding protein A8                                                       | Activation of cysteine-type endopeptidase activity involved in apoptotic process                                                                             | 4.471       | 8.81E-10 | 1.00E-07                       | Up-regulated            |
| <i>SI00A9</i>   | SI00 calcium binding protein A9                                                       | Activation of cysteine-type endopeptidase activity involved in apoptotic process                                                                             | 3.88        | 4.40E-07 | 1.55E-05                       | Up-regulated            |

Continued on next page



**On-line Table 1: Continued**

| Gene Name       | Description                                                                                 | Gene Main Function Determined by Gene Ontology                                                                                                               | Fold Change | P Value  | False Discovery Rate (q Value) | Direction of Expression |
|-----------------|---------------------------------------------------------------------------------------------|--------------------------------------------------------------------------------------------------------------------------------------------------------------|-------------|----------|--------------------------------|-------------------------|
| <i>S100B</i>    | S100 calcium binding protein B                                                              | Negative regulation of skeletal muscle cell differentiation                                                                                                  | -2.304      | 1.68E-12 | 5.72E-10                       | Down-regulated          |
| <i>S1PR3</i>    | Sphingosine-1-phosphate receptor 3                                                          | Adenylate cyclase-inhibiting G-protein coupled receptor signaling pathway                                                                                    | 3.312       | 4.08E-07 | 1.45E-05                       | Up-regulated            |
| <i>SAMSN1</i>   | SAM domain, SH3 domain and nuclear localization signals 1                                   | Negative regulation of peptidyl-tyrosine phosphorylation                                                                                                     | 2.718       | 6.50E-10 | 7.64E-08                       | Up-regulated            |
| <i>SAPCD1</i>   | Suppressor APC domain containing 1                                                          | Unknown                                                                                                                                                      | -2.205      | 1.57E-10 | 2.53E-08                       | Down-regulated          |
| <i>SCG2</i>     | Secretogranin II                                                                            | Negative regulation of sequence-specific DNA binding transcription factor activity                                                                           | 3.773       | 3.93E-04 | 3.34E-03                       | Up-regulated            |
| <i>SCIMP</i>    | SLP adaptor and CSK interacting membrane protein                                            | Positive regulation of ERK1 and ERK2 cascade                                                                                                                 | 5.091       | 5.28E-09 | 4.40E-07                       | Up-regulated            |
| <i>SCN4A</i>    | Sodium channel, voltage gated, type IV $\alpha$ subunit                                     | Membrane depolarization during action potential                                                                                                              | 2.368       | 3.47E-05 | 5.02E-04                       | Up-regulated            |
| <i>SCN7A</i>    | Sodium channel, voltage gated, type VII $\alpha$ subunit                                    | Membrane depolarization during action potential                                                                                                              | -2.228      | 4.81E-06 | 1.02E-04                       | Down-regulated          |
| <i>SERPINB2</i> | Serpin peptidase inhibitor, clade B (ovalbumin), member 2                                   | Negative regulation of endopeptidase activity                                                                                                                | 3.195       | 6.47E-05 | 8.09E-04                       | Up-regulated            |
| <i>SFRP5</i>    | Secreted frizzled-related protein 5                                                         | Negative regulation of Wnt signaling pathway involved in digestive tract morphogenesis                                                                       | -2.394      | 4.40E-08 | 2.44E-06                       | Down-regulated          |
| <i>SGOL1</i>    | Shugoshin-like 1 (S. Pombe)                                                                 | Attachment of spindle microtubules to kinetochore                                                                                                            | 2.318       | 3.17E-04 | 2.82E-03                       | Up-regulated            |
| <i>SGPL1</i>    | Sphingosine-1-phosphate lyase 1                                                             | Platelet-derived growth factor receptor signaling pathway                                                                                                    | 2.051       | 1.78E-07 | 7.29E-06                       | Up-regulated            |
| <i>SH2D1B</i>   | SH2 domain containing 1B                                                                    | Positive regulation of natural killer cell mediated immunity                                                                                                 | 2.482       | 9.19E-07 | 2.68E-05                       | Up-regulated            |
| <i>SIGLEC15</i> | Sialic acid binding Ig-like lectin 15                                                       | Cellular response to lipoprotein particle stimulus                                                                                                           | 3.027       | 2.86E-07 | 1.10E-05                       | Up-regulated            |
| <i>SIRPB1</i>   | Signal-regulatory protein $\beta$ 1                                                         | Cell surface receptor signaling pathway                                                                                                                      | 3.985       | 1.78E-04 | 1.82E-03                       | Up-regulated            |
| <i>SIRPB1</i>   | Signal-regulatory protein $\beta$ 1                                                         | Cell surface receptor signaling pathway                                                                                                                      | 5.665       | 5.54E-09 | 4.53E-07                       | Up-regulated            |
| <i>SIRPB2</i>   | Signal-regulatory protein $\beta$ 2                                                         | Positive regulation of cell-cell adhesion                                                                                                                    | 2.091       | 5.04E-08 | 2.68E-06                       | Up-regulated            |
| <i>SLAMF1</i>   | Signaling lymphocytic activation molecule family member 1                                   | Positive regulation of cell proliferation                                                                                                                    | 2.893       | 7.33E-07 | 2.27E-05                       | Up-regulated            |
| <i>SLAMF6</i>   | SLAM family member 6                                                                        | Integral component of membrane                                                                                                                               | 3.339       | 3.93E-09 | 3.42E-07                       | Up-regulated            |
| <i>SLAMF7</i>   | SLAM family member 7                                                                        | Natural killer cell mediated cytotoxicity                                                                                                                    | 6.67        | 2.89E-14 | 2.14E-11                       | Up-regulated            |
| <i>SLAMF8</i>   | SLAM family member 8                                                                        | Regulation of NAD(P)H oxidase activity                                                                                                                       | 2.166       | 1.01E-05 | 1.88E-04                       | Up-regulated            |
| <i>SLC11A1</i>  | Solute carrier family 11 (proton-coupled divalent metal ion transporter), member 1          | Positive regulation of dendritic cell antigen processing and presentation                                                                                    | 4.39        | 1.37E-08 | 9.22E-07                       | Up-regulated            |
| <i>SLC16A6</i>  | Solute carrier family 16 member 6                                                           | Monocarboxylic acid transmembrane transporter activity                                                                                                       | 3.28        | 1.01E-09 | 1.13E-07                       | Up-regulated            |
| <i>SLC35D2</i>  | Solute carrier family 35 (UDP-glcnac/UDP-glucose transporter), member D2                    | Pyrimidine nucleotide-sugar transmembrane transporter activity                                                                                               | 2.056       | 1.37E-07 | 5.90E-06                       | Up-regulated            |
| <i>SLC35D3</i>  | Solute carrier family 35 member D3                                                          | Pyrimidine nucleotide-sugar transmembrane transporter activity                                                                                               | 2.987       | 1.17E-05 | 2.11E-04                       | Up-regulated            |
| <i>SLC35F1</i>  | Solute carrier family 35 member F1                                                          | Integral component of membrane                                                                                                                               | -2.288      | 3.95E-07 | 1.43E-05                       | Down-regulated          |
| <i>SLC36A2</i>  | Solute carrier family 36 (proton/amino acid symporter), member 2                            | Hydrogen ion transmembrane transporter activity                                                                                                              | -2.072      | 4.47E-05 | 6.08E-04                       | Down-regulated          |
| <i>SLC44A4</i>  | Solute carrier family 44 member 4                                                           | Glycerophospholipid biosynthetic process                                                                                                                     | 2.198       | 4.23E-05 | 5.84E-04                       | Up-regulated            |
| <i>SLC6A15</i>  | Solute carrier family 6 (neutral amino acid transporter), member 15                         | Neurotransmitter: sodium symporter activity                                                                                                                  | 3.409       | 4.83E-08 | 2.60E-06                       | Up-regulated            |
| <i>SLC6A7</i>   | Solute carrier family 6 (neurotransmitter transporter), member 7                            | L-proline transmembrane transporter activity                                                                                                                 | 2.689       | 1.62E-06 | 4.28E-05                       | Up-regulated            |
| <i>SLC7A10</i>  | Solute carrier family 7 (neutral amino acid transporter light chain, asc system), member 10 | Neutral amino acid transmembrane transporter activity                                                                                                        | -2.088      | 4.76E-04 | 3.89E-03                       | Down-regulated          |
| <i>SLC7A11</i>  | Solute carrier family 7 (anionic amino acid transporter light chain, xc- system), member 11 | Integral component of plasma membrane                                                                                                                        | 3.344       | 3.59E-06 | 8.02E-05                       | Up-regulated            |
| <i>SLC7A7</i>   | Solute carrier family 7 (amino acid transporter light chain, y+L system), member 7          | Basic amino acid transmembrane transporter activity                                                                                                          | 2.097       | 4.66E-07 | 1.62E-05                       | Up-regulated            |
| <i>SLCO4C1</i>  | Solute carrier organic anion transporter family, member 4C1                                 | Sodium-independent organic anion transport                                                                                                                   | 4.099       | 1.31E-08 | 8.96E-07                       | Up-regulated            |
| <i>SMPDL3B</i>  | Sphingomyelin phosphodiesterase, acid-like 3B                                               | Hydrolase activity, acting on glycosyl bonds                                                                                                                 | 2.57        | 5.66E-05 | 7.28E-04                       | Up-regulated            |
| <i>SNX10</i>    | Sorting nexin 10                                                                            | Extrinsic component of endosome membrane                                                                                                                     | 2.372       | 2.34E-09 | 2.25E-07                       | Up-regulated            |
| <i>SORCS1</i>   | Sortilin-related VPS10 domain containing receptor 1                                         | Integral component of membrane                                                                                                                               | -2.703      | 3.77E-07 | 1.38E-05                       | Down-regulated          |
| <i>SOST</i>     | Sclerostin                                                                                  | Negative regulation of Wnt signaling pathway involved in dorsal/ventral axis specification                                                                   | -2.05       | 9.65E-04 | 6.95E-03                       | Down-regulated          |
| <i>SPAG5</i>    | Sperm associated antigen 5                                                                  | Regulation of attachment of spindle microtubules to kinetochore                                                                                              | 3.271       | 1.92E-06 | 4.87E-05                       | Up-regulated            |
| <i>SP1</i>      | Spi-1 proto-oncogene                                                                        | RNA polymerase II core promoter proximal region sequence-specific DNA binding transcription factor activity involved in negative regulation of transcription | 2.178       | 1.22E-08 | 8.47E-07                       | Up-regulated            |
| <i>SPOCK1</i>   | Sparc/osteonectin, cwcv and kazal-like domains proteoglycan (testican) 1                    | Negative regulation of neuron projection development                                                                                                         | 2.393       | 1.29E-04 | 1.41E-03                       | Up-regulated            |
| <i>SRCIN1</i>   | SRC kinase signaling inhibitor 1                                                            | Negative regulation of protein tyrosine kinase activity                                                                                                      | -4.21       | 7.90E-08 | 3.85E-06                       | Down-regulated          |
| <i>SRGN</i>     | Serglycin                                                                                   | Maintenance of protease location in mast cell secretory granule                                                                                              | 3.309       | 3.29E-10 | 4.63E-08                       | Up-regulated            |

Continued on next page

**On-line Table 1: Continued**

| Gene Name        | Description                                                     | Gene Main Function Determined by Gene Ontology                                                                                                               | Fold Change | P Value  | False Discovery Rate (q Value) | Direction of Expression |
|------------------|-----------------------------------------------------------------|--------------------------------------------------------------------------------------------------------------------------------------------------------------|-------------|----------|--------------------------------|-------------------------|
| <i>SSTR1</i>     | Somatostatin receptor 1                                         | G-protein coupled receptor signaling pathway, coupled to cyclic nucleotide second messenger                                                                  | -2.067      | 3.72E-04 | 3.18E-03                       | Down-regulated          |
| <i>ST3GALS5</i>  | ST3 $\beta$ -galactoside $\alpha$ -23-sialyltransferase 5       | Neolactotetraosylceramide $\alpha$ -23-sialyltransferase activity                                                                                            | 2.093       | 2.02E-07 | 8.09E-06                       | Up-regulated            |
| <i>STAP1</i>     | Signal transducing adaptor family member 1                      | Positive regulation of non-membrane spanning protein tyrosine kinase activity                                                                                | 2.109       | 1.19E-04 | 1.32E-03                       | Up-regulated            |
| <i>STIL</i>      | <i>SCL/TAL1</i> interrupting locus                              | Positive regulation of cyclin-dependent protein serine/threonine kinase activity                                                                             | 3.181       | 6.65E-06 | 1.33E-04                       | Up-regulated            |
| <i>STX11</i>     | Syntaxin 11                                                     | Synaptic vesicle fusion to presynaptic membrane                                                                                                              | 3.049       | 2.42E-08 | 1.49E-06                       | Up-regulated            |
| <i>SUCNR1</i>    | Succinate receptor 1                                            | G-protein coupled receptor signaling pathway                                                                                                                 | 3.843       | 1.59E-07 | 6.76E-06                       | Up-regulated            |
| <i>SUSD3</i>     | Sushi domain containing 3                                       | Integral component of membrane                                                                                                                               | 2.1         | 9.75E-08 | 4.55E-06                       | Up-regulated            |
| <i>TCF19</i>     | Transcription factor 19                                         | Regulation of transcription from RNA polymerase II promoter                                                                                                  | 2.048       | 9.95E-05 | 1.14E-03                       | Up-regulated            |
| <i>TCN1</i>      | Transcobalamin I (vitamin B12 binding protein, R binder family) | Water-soluble vitamin metabolic process                                                                                                                      | 3.345       | 1.77E-05 | 2.96E-04                       | Up-regulated            |
| <i>TESPA1</i>    | Thymocyte expressed, positive selection associated 1            | Positive regulation of T cell receptor signaling pathway                                                                                                     | 2.938       | 8.77E-09 | 6.59E-07                       | Up-regulated            |
| <i>TFEC</i>      | Transcription factor EC                                         | RNA polymerase II core promoter proximal region sequence-specific DNA binding transcription factor activity involved in positive regulation of transcription | 2.519       | 2.49E-07 | 9.66E-06                       | Up-regulated            |
| <i>TGFA</i>      | Transforming growth factor, $\alpha$                            | Positive regulation of epidermal growth factor-activated receptor activity                                                                                   | 4.673       | 1.17E-11 | 2.65E-09                       | Up-regulated            |
| <i>THRSP</i>     | Thyroid hormone responsive                                      | Regulation of triglyceride biosynthetic process                                                                                                              | -3.089      | 1.78E-06 | 4.55E-05                       | Down-regulated          |
| <i>TIAM1</i>     | T-cell lymphoma invasion and metastasis 1                       | Extrinsic component of cytoplasmic side of plasma membrane                                                                                                   | 2.143       | 5.87E-08 | 2.98E-06                       | Up-regulated            |
| <i>TLR10</i>     | Toll-like receptor 10                                           | <i>Myd88</i> -dependent toll-like receptor signaling pathway                                                                                                 | 2.209       | 1.58E-05 | 2.72E-04                       | Up-regulated            |
| <i>TLR2</i>      | Toll-like receptor 2                                            | Induction by symbiont of defense-related host nitric oxide production                                                                                        | 2.165       | 1.22E-07 | 5.38E-06                       | Up-regulated            |
| <i>TMEM156</i>   | Transmembrane protein 156                                       | Integral component of membrane                                                                                                                               | 2.456       | 4.77E-06 | 1.02E-04                       | Up-regulated            |
| <i>TMEM233</i>   | Transmembrane protein 233                                       | Integral component of membrane                                                                                                                               | -2.646      | 2.31E-05 | 3.68E-04                       | Down-regulated          |
| <i>TMEM26</i>    | Transmembrane protein 26                                        | Integral component of membrane                                                                                                                               | 2.509       | 1.56E-06 | 4.13E-05                       | Up-regulated            |
| <i>TMEM37</i>    | Transmembrane protein 37                                        | Regulation of ion transmembrane transport                                                                                                                    | 2.096       | 1.52E-06 | 4.06E-05                       | Up-regulated            |
| <i>TMPRSS11D</i> | Transmembrane protease, serine 11D                              | Integral component of plasma membrane                                                                                                                        | 2.239       | 9.63E-04 | 6.94E-03                       | Up-regulated            |
| <i>TNFRSF17</i>  | Tumor necrosis factor receptor superfamily, member 17           | Multicellular organismal development                                                                                                                         | 3.411       | 5.91E-06 | 1.21E-04                       | Up-regulated            |
| <i>TNFSF11</i>   | Tumor necrosis factor (ligand) superfamily, member 11           | Positive regulation of fever generation by positive regulation of prostaglandin secretion                                                                    | 2.237       | 2.91E-04 | 2.63E-03                       | Up-regulated            |
| <i>TNFSF13B</i>  | Tumor necrosis factor (ligand) superfamily, member 13b          | Positive regulation of germinal center formation                                                                                                             | 2.231       | 2.23E-08 | 1.39E-06                       | Up-regulated            |
| <i>TNIP3</i>     | TNFAIP3 interacting protein 3                                   | Negative regulation of I- $\kappa$ B kinase/ nuclear factor- $\kappa$ B signaling                                                                            | 3.007       | 2.67E-08 | 1.60E-06                       | Up-regulated            |
| <i>TOP2A</i>     | Topoisomerase (DNA) II $\alpha$ 170kDa                          | Positive regulation of single-stranded viral RNA replication via double-stranded DNA intermediate                                                            | 2.336       | 1.03E-05 | 1.91E-04                       | Up-regulated            |
| <i>TREM1</i>     | Triggering receptor expressed on myeloid cells 1                | Activation of mitophagy in response to mitochondrial depolarization                                                                                          | 4.346       | 4.86E-10 | 6.14E-08                       | Up-regulated            |
| <i>TREML2</i>    | Triggering receptor expressed on myeloid cells-like 2           | Integral component of membrane                                                                                                                               | 4.572       | 2.79E-06 | 6.59E-05                       | Up-regulated            |
| <i>TREML2</i>    | Triggering receptor expressed on myeloid cells-like 2           | Integral component of membrane                                                                                                                               | 4.098       | 1.28E-04 | 1.39E-03                       | Up-regulated            |
| <i>TREML2</i>    | Triggering receptor expressed on myeloid cells-like 2           | Integral component of membrane                                                                                                                               | 4.275       | 1.97E-06 | 4.95E-05                       | Up-regulated            |
| <i>TREML2</i>    | Triggering receptor expressed on myeloid cells-like 2           | Integral component of membrane                                                                                                                               | 5.991       | 5.24E-10 | 6.39E-08                       | Up-regulated            |
| <i>TREML2</i>    | Triggering receptor expressed on myeloid cells-like 2           | Integral component of membrane                                                                                                                               | 3.421       | 2.42E-04 | 2.31E-03                       | Up-regulated            |
| <i>TREML2</i>    | Triggering receptor expressed on myeloid cells-like 2           | Integral component of membrane                                                                                                                               | 5.149       | 9.33E-07 | 2.70E-05                       | Up-regulated            |
| <i>TREML2</i>    | Triggering receptor expressed on myeloid cells-like 2           | Integral component of membrane                                                                                                                               | 5.487       | 1.12E-06 | 3.13E-05                       | Up-regulated            |
| <i>TREML2</i>    | Triggering receptor expressed on myeloid cells-like 2           | Integral component of membrane                                                                                                                               | 4           | 5.31E-08 | 2.75E-06                       | Up-regulated            |
| <i>TREML2</i>    | Triggering receptor expressed on myeloid cells-like 2           | Integral component of membrane                                                                                                                               | 5.191       | 3.80E-09 | 3.36E-07                       | Up-regulated            |
| <i>TREML2</i>    | Triggering receptor expressed on myeloid cells-like 2           | Integral component of membrane                                                                                                                               | 5.02        | 3.35E-06 | 7.60E-05                       | Up-regulated            |
| <i>TREML2</i>    | Triggering receptor expressed on myeloid cells-like 2           | Integral component of membrane                                                                                                                               | 3.547       | 1.67E-04 | 1.73E-03                       | Up-regulated            |
| <i>TREML2</i>    | Triggering receptor expressed on myeloid cells-like 2           | Integral component of membrane                                                                                                                               | 3.839       | 1.01E-05 | 1.88E-04                       | Up-regulated            |
| <i>TREML2</i>    | Triggering receptor expressed on myeloid cells-like 2           | Integral component of membrane                                                                                                                               | 5.332       | 9.17E-09 | 6.79E-07                       | Up-regulated            |
| <i>TREML2</i>    | Triggering receptor expressed on myeloid cells-like 2           | Integral component of membrane                                                                                                                               | 5.417       | 9.11E-09 | 6.79E-07                       | Up-regulated            |

Continued on next page

**On-line Table 1: Continued**

| Gene Name      | Description                                                      | Gene Main Function Determined by Gene Ontology                                              | Fold Change | P Value  | False Discovery Rate (q Value) | Direction of Expression |
|----------------|------------------------------------------------------------------|---------------------------------------------------------------------------------------------|-------------|----------|--------------------------------|-------------------------|
| <i>TREML2</i>  | Triggering receptor expressed on myeloid cells-like 2            | Integral component of membrane                                                              | 5.139       | 8.77E-07 | 2.60E-05                       | Up-regulated            |
| <i>TREML2</i>  | Triggering receptor expressed on myeloid cells-like 2            | Integral component of membrane                                                              | 3.754       | 1.27E-05 | 2.26E-04                       | Up-regulated            |
| <i>TREML2</i>  | Triggering receptor expressed on myeloid cells-like 2            | Integral component of membrane                                                              | 5.665       | 5.03E-07 | 1.70E-05                       | Up-regulated            |
| <i>TREML2</i>  | Triggering receptor expressed on myeloid cells-like 2            | Integral component of membrane                                                              | 4.579       | 1.50E-05 | 2.61E-04                       | Up-regulated            |
| <i>TREML2</i>  | Triggering receptor expressed on myeloid cells-like 2            | Integral component of membrane                                                              | 4.251       | 2.09E-06 | 5.16E-05                       | Up-regulated            |
| <i>TREML2</i>  | Triggering receptor expressed on myeloid cells-like 2            | Integral component of membrane                                                              | 6.037       | 6.86E-09 | 5.35E-07                       | Up-regulated            |
| <i>TREML2</i>  | Triggering receptor expressed on myeloid cells-like 2            | Integral component of membrane                                                              | 5.1         | 5.23E-08 | 2.72E-06                       | Up-regulated            |
| <i>TREML2</i>  | Triggering receptor expressed on myeloid cells-like 2            | Integral component of membrane                                                              | 3.996       | 2.68E-05 | 4.14E-04                       | Up-regulated            |
| <i>TREML2</i>  | Triggering receptor expressed on myeloid cells-like 2            | Integral component of membrane                                                              | 7.583       | 1.06E-06 | 3.01E-05                       | Up-regulated            |
| <i>TREML2</i>  | Triggering receptor expressed on myeloid cells-like 2            | Integral component of membrane                                                              | 6.054       | 2.37E-08 | 1.47E-06                       | Up-regulated            |
| <i>TREML2</i>  | Triggering receptor expressed on myeloid cells-like 2            | Integral component of membrane                                                              | 3.771       | 2.79E-04 | 2.57E-03                       | Up-regulated            |
| <i>TREML2</i>  | Triggering receptor expressed on myeloid cells-like 2            | Integral component of membrane                                                              | 4.355       | 2.88E-05 | 4.34E-04                       | Up-regulated            |
| <i>TREML2</i>  | Triggering receptor expressed on myeloid cells-like 2            | Integral component of membrane                                                              | 5.873       | 3.82E-11 | 7.20E-09                       | Up-regulated            |
| <i>TREML2</i>  | Triggering receptor expressed on myeloid cells-like 2            | Integral component of membrane                                                              | 4.231       | 8.54E-06 | 1.64E-04                       | Up-regulated            |
| <i>TREML2</i>  | Triggering receptor expressed on myeloid cells-like 2            | Integral component of membrane                                                              | 4.745       | 1.62E-07 | 6.82E-06                       | Up-regulated            |
| <i>TREML2</i>  | Triggering receptor expressed on myeloid cells-like 2            | Integral component of membrane                                                              | 3.894       | 1.76E-05 | 2.95E-04                       | Up-regulated            |
| <i>TREML2</i>  | Triggering receptor expressed on myeloid cells-like 2            | Integral component of membrane                                                              | 4.291       | 3.87E-05 | 5.47E-04                       | Up-regulated            |
| <i>TREML2</i>  | Triggering receptor expressed on myeloid cells-like 2            | Integral component of membrane                                                              | 7.083       | 1.36E-07 | 5.87E-06                       | Up-regulated            |
| <i>TREML2</i>  | Triggering receptor expressed on myeloid cells-like 2            | Integral component of membrane                                                              | 6.245       | 1.16E-06 | 3.22E-05                       | Up-regulated            |
| <i>TREML2</i>  | Triggering receptor expressed on myeloid cells-like 2            | Integral component of membrane                                                              | 4.9         | 1.73E-06 | 4.47E-05                       | Up-regulated            |
| <i>TREML2</i>  | Triggering receptor expressed on myeloid cells-like 2            | Integral component of membrane                                                              | 4.671       | 1.08E-06 | 3.07E-05                       | Up-regulated            |
| <i>TREML2</i>  | Triggering receptor expressed on myeloid cells-like 2            | Integral component of membrane                                                              | 4.948       | 7.10E-07 | 2.23E-05                       | Up-regulated            |
| <i>TREML2</i>  | Triggering receptor expressed on myeloid cells-like 2            | Integral component of membrane                                                              | 3.039       | 3.98E-04 | 3.36E-03                       | Up-regulated            |
| <i>TREML3P</i> | Triggering receptor expressed on myeloid cells-like 3 pseudogene | Unknown                                                                                     | 4.932       | 4.66E-08 | 2.53E-06                       | Up-regulated            |
| <i>TROAP</i>   | Trophinin associated protein                                     | Protein binding                                                                             | 2.021       | 4.90E-04 | 3.97E-03                       | Up-regulated            |
| <i>TTK</i>     | TTK protein kinase                                               | Positive regulation of pathway-restricted SMAD protein phosphorylation                      | 2.88        | 2.66E-04 | 2.48E-03                       | Up-regulated            |
| <i>TUBA4A</i>  | Tubulin. $\alpha$ 4a                                             | "De novo" posttranslational protein folding                                                 | 3.153       | 4.56E-08 | 2.49E-06                       | Up-regulated            |
| <i>TXLNB</i>   | Taxilin $\beta$                                                  | Syntaxin binding                                                                            | 2.408       | 4.68E-06 | 1.00E-04                       | Up-regulated            |
| <i>UBASH3B</i> | Ubiquitin associated and SH3 domain containing B                 | Regulation of release of sequestered calcium ion into cytosol                               | 2.427       | 6.47E-09 | 5.13E-07                       | Up-regulated            |
| <i>UBE2T</i>   | Ubiquitin-conjugating enzyme E2T                                 | Cellular response to DNA damage stimulus                                                    | 2.217       | 2.81E-05 | 4.27E-04                       | Up-regulated            |
| <i>USH2A</i>   | Usher syndrome 2A (autosomal recessive, mild)                    | Inner ear receptor cell differentiation                                                     | -2.932      | 9.33E-08 | 4.39E-06                       | Down-regulated          |
| <i>VSIG4</i>   | V-set and immunoglobulin domain containing 4                     | Negative regulation of interleukin-2 production                                             | 2174        | 3.88E-05 | 5.49E-04                       | Up-regulated            |
| <i>VSTM2A</i>  | V-set and transmembrane domain containing 2A                     | Extracellular region                                                                        | -2.366      | 2.43E-06 | 5.89E-05                       | Down-regulated          |
| <i>VTN</i>     | Vitronectin                                                      | Positive regulation of vascular endothelial growth factor receptor signaling pathway        | 2.774       | 9.01E-04 | 6.56E-03                       | Up-regulated            |
| <i>XCRI</i>    | Chemokine (C motif) receptor 1                                   | G-protein coupled receptor signaling pathway, coupled to cyclic nucleotide second messenger | 2.505       | 8.06E-05 | 9.71E-04                       | Up-regulated            |
| <i>XDH</i>     | Xanthine dehydrogenase                                           | Activation of cysteine-type endopeptidase activity involved in apoptotic process            | 6.298       | 2.62E-10 | 3.85E-08                       | Up-regulated            |
| <i>XIRP1</i>   | Xin actin-binding repeat containing 1                            | Actin cytoskeleton organization                                                             | -2.233      | 4.43E-04 | 3.67E-03                       | Down-regulated          |
| <i>XPRI</i>    | Xenotropic and polytropic retrovirus receptor 1                  | G-protein coupled receptor signaling pathway                                                | 2.217       | 1.80E-11 | 3.82E-09                       | Up-regulated            |
| <i>ZWILCH</i>  | Zwilch kinetochore protein                                       | Small GTPase mediated signal transduction                                                   | 2.427       | 2.05E-06 | 5.08E-05                       | Up-regulated            |

<sup>a</sup> Genes were determined to be differentially expressed if the *P* value was < .05, the false discovery rate was <0.01, and the fold change was >2 (up-regulated) or  $\leq$ 2 (down-regulated). Gene variations were determined by IPA software. The main functions of genes were determined using gene ontology (<http://geneontology.org/>).

**On-line Table 2: Most involved canonical pathways, coil versus control, determined by IPA**

| Canonical Biologic Pathway                                  | No. of Genes Up-Regulated | Genes                                                                                                               | No. of Genes Down-Regulated | Genes                     |
|-------------------------------------------------------------|---------------------------|---------------------------------------------------------------------------------------------------------------------|-----------------------------|---------------------------|
| Altered T-cell and B-cell signaling in rheumatoid arthritis | 15                        | <i>CD79B, CXCL13, HLA-DRA, IL6, IL10, IL1B, IL1RN, IL23A, LTA, SLAMF1, TLR2, TLR10, TNFRSF17, TNFSF11, TNFSF13B</i> | 0                           | NA                        |
| Granulocyte adhesion and diapedesis                         | 16                        | <i>CCL4, CCL5, CCL20, CXCL8, CXCL13, CXCR4, IL18RAP, IL1B, IL1RAP, IL1RN, ITGA4, MMP1, MMP3, MMP12, MMP13</i>       | 2                           | <i>CLDN19, HRH1</i>       |
| Agranulocyte adhesion and diapedesis                        | 15                        | <i>CCL4, CCL5, CCL20, CXCL8, CXCL11, CXCL13, CXCR4, IL1B, IL1RN, ITGA4, MMP1, MMP3, MMP12, MMP13, MYH7</i>          | 3                           | <i>CDN19, HRH1, MYH7B</i> |
| Interleukin-10 signaling                                    | 11                        | <i>CCR1, CCR5, CD14, HMOX1, IL6, IL10, IL18RAP, IL18, IL1RAP, IL1RN, MAPK13</i>                                     | 0                           | NA                        |
| Communication between innate and adaptive immune cells      | 12                        | <i>CCL4, CCL5, CXCL8, HLA-DRA, IL6, IL10, IL1B, IL1RN, TLR2, TLR10, TNFRSF17, TNFSF13B</i>                          | 0                           | NA                        |

**Note:**—NA indicates not applicable.

**On-line Table 3: Up- and down-regulated molecules comparing flow-diverted versus untreated aneurysms, determined by IPA<sup>a</sup>**

| Gene Name | Description                                                          | Gene Main Function Determined by Gene Ontology                                                                                                                 | Fold Change | P Value  | False Discovery Rate (q Value) | Direction of Expression |
|-----------|----------------------------------------------------------------------|----------------------------------------------------------------------------------------------------------------------------------------------------------------|-------------|----------|--------------------------------|-------------------------|
| ADAMTS14  | ADAM metalloproteinase with thrombospondin type 1 motif, 14          | Proteinaceous extracellular matrix                                                                                                                             | 2.265       | 6.43E-04 | 3.81E-02                       | Up-regulated            |
| ADAMTS4   | ADAM metalloproteinase with thrombospondin type 1 motif, 4           | Proteinaceous extracellular matrix                                                                                                                             | 3.275       | 4.22E-07 | 1.41E-03                       | Up-regulated            |
| ALAS2     | 5'-aminolevulinic acid synthase 2                                    | Porphyrin-containing compound metabolic process                                                                                                                | 2.34        | 1.19E-03 | 4.90E-02                       | Up-regulated            |
| APLN      | Apelin                                                               | Positive regulation of corticotropin-releasing hormone secretion                                                                                               | 4.412       | 2.37E-05 | 9.93E-03                       | Up-regulated            |
| ARG1      | Arginase 1                                                           | Cellular response to transforming growth factor $\beta$ stimulus                                                                                               | 2.451       | 2.42E-03 | 6.91E-02                       | Up-regulated            |
| ASPM      | Asp (abnormal spindle) homolog, microcephaly associated (Drosophila) | Positive regulation of canonical Wnt signaling pathway                                                                                                         | 2.623       | 3.22E-04 | 2.69E-02                       | Up-regulated            |
| ATP6V0D2  | ATPase, H <sup>+</sup> transporting, lysosomal 38kDa, V0 subunit d2  | Vacuolar proton-transporting V-type ATPase complex                                                                                                             | 2.422       | 4.02E-03 | 9.07E-02                       | Up-regulated            |
| AURKB     | Aurora kinase B                                                      | Anaphase-promoting complex-dependent proteasomal ubiquitin-dependent protein catabolic process                                                                 | 3.335       | 9.08E-04 | 4.41E-02                       | Up-regulated            |
| BCL6B     | B-cell CLL/lymphoma 6 member B                                       | RNA polymerase II transcription regulatory region sequence-specific DNA binding transcription factor activity involved in negative regulation of transcription | 2.615       | 1.56E-04 | 2.06E-02                       | Up-regulated            |
| BUB1      | BUB1 mitotic checkpoint serine/threonine kinase                      | Positive regulation of intrinsic apoptotic signaling pathway                                                                                                   | 2.934       | 8.31E-04 | 4.17E-02                       | Up-regulated            |
| BUB1B     | BUB1 mitotic checkpoint serine/threonine kinase B                    | Anaphase-promoting complex-dependent proteasomal ubiquitin-dependent protein catabolic process                                                                 | 2.734       | 2.27E-04 | 2.43E-02                       | Up-regulated            |
| C17orf53  | Chromosome 17 open reading frame 53                                  | Unknown                                                                                                                                                        | 2.01        | 4.21E-04 | 3.13E-02                       | Up-regulated            |
| CA1       | Carbonic anhydrase I                                                 | Small molecule metabolic process                                                                                                                               | 2.999       | 2.45E-04 | 2.48E-02                       | Up-regulated            |
| CA12      | Carbonic anhydrase XII                                               | Small molecule metabolic process                                                                                                                               | 2.38        | 3.49E-04 | 2.78E-02                       | Up-regulated            |
| CA2       | Carbonic anhydrase II                                                | Positive regulation of dipeptide transmembrane transport                                                                                                       | 2.728       | 5.05E-04 | 3.47E-02                       | Up-regulated            |
| CA9       | Carbonic anhydrase IX                                                | Regulation of transcription from RNA polymerase II promoter in response to hypoxia                                                                             | 2.561       | 1.36E-04 | 1.90E-02                       | Up-regulated            |
| CAMK1G    | Calcium/calmodulin-dependent protein kinase 1G                       | Calcium- and calmodulin-dependent protein kinase complex                                                                                                       | 2.953       | 2.50E-04 | 2.49E-02                       | Up-regulated            |
| CCDC163P  | Coiled-coil domain containing 163 pseudogene                         | Unknown                                                                                                                                                        | 2.131       | 4.99E-04 | 3.46E-02                       | Up-regulated            |
| CCL2      | Chemokine (C-C motif) ligand 2                                       | G-protein coupled receptor signaling pathway, coupled to cyclic nucleotide second messenger                                                                    | 2.062       | 1.08E-03 | 4.68E-02                       | Up-regulated            |
| CCNB1     | Cyclin B1                                                            | Positive regulation of ubiquitin-protein ligase activity involved in regulation of mitotic cell cycle transition                                               | 3.289       | 6.76E-05 | 1.31E-02                       | Up-regulated            |
| CCNB2     | Cyclin B2                                                            | G2/M transition of mitotic cell cycle                                                                                                                          | 3.441       | 5.43E-04 | 3.58E-02                       | Up-regulated            |
| CD72      | CD72 molecule                                                        | Transmembrane signaling receptor activity                                                                                                                      | 2.52        | 2.62E-03 | 7.19E-02                       | Up-regulated            |
| CDC20     | Cell division cycle 20                                               | Positive regulation of ubiquitin-protein ligase activity involved in regulation of mitotic cell cycle transition                                               | 2.792       | 3.88E-04 | 2.97E-02                       | Up-regulated            |
| CDC25A    | Cell division cycle 25A                                              | Regulation of cyclin-dependent protein serine/threonine kinase activity                                                                                        | 2.54        | 7.99E-04 | 4.11E-02                       | Up-regulated            |
| CDC45     | Cell division cycle 45                                               | Pre-replicative complex assembly involved in nuclear cell cycle DNA replication                                                                                | 3.057       | 6.27E-04 | 3.81E-02                       | Up-regulated            |
| CDCA2     | Cell division cycle associated 2                                     | Positive regulation of protein dephosphorylation                                                                                                               | 2.488       | 2.53E-03 | 7.04E-02                       | Up-regulated            |
| CDCA3     | Cell division cycle associated 3                                     | Mitotic nuclear division                                                                                                                                       | 2.028       | 4.82E-05 | 1.18E-02                       | Up-regulated            |
| CDCA7     | Cell division cycle associated 7                                     | Regulation of transcription, DNA-templated                                                                                                                     | 3.687       | 5.54E-04 | 3.61E-02                       | Up-regulated            |
| CDH5      | Cadherin 5 type 2 (vascular endothelium)                             | Homophilic cell adhesion via plasma membrane adhesion molecules                                                                                                | 2.032       | 4.80E-04 | 3.34E-02                       | Up-regulated            |
| CDK1      | Cyclin-dependent kinase 1                                            | Positive regulation of ubiquitin-protein ligase activity involved in regulation of mitotic cell cycle transition                                               | 2.41        | 6.59E-04 | 3.81E-02                       | Up-regulated            |
| CELSR3    | Cadherin, EGF LAG seven-pass G-type receptor 3                       | Homophilic cell adhesion via plasma membrane adhesion molecules                                                                                                | 2.625       | 1.69E-03 | 5.80E-02                       | Up-regulated            |
| CENPA     | Centromere protein A                                                 | Protein localization to chromosome, centromeric region                                                                                                         | 3.83        | 1.36E-04 | 1.90E-02                       | Up-regulated            |
| CENPE     | Centromere protein E, 312kDa                                         | Antigen processing and presentation of exogenous peptide antigen via MHC class II                                                                              | 2.257       | 2.74E-03 | 7.33E-02                       | Up-regulated            |
| CENPT     | Centromere protein T                                                 | Small GTPase mediated signal transduction                                                                                                                      | 2.089       | 1.24E-03 | 4.96E-02                       | Up-regulated            |
| CEP55     | Centrosomal protein 55kDa                                            | Establishment of protein localization                                                                                                                          | 2.791       | 1.32E-03 | 5.15E-02                       | Up-regulated            |
| CFAP52    | Cilia and flagella associated protein 52                             | Cell projection                                                                                                                                                | 3.426       | 1.07E-06 | 2.03E-03                       | Up-regulated            |
| CHI3L1    | Chitinase 3-like 1 (cartilage glycoprotein-39)                       | Positive regulation of peptidyl-threonine phosphorylation                                                                                                      | 4.249       | 3.04E-06 | 3.05E-03                       | Up-regulated            |
| CHRD12    | Chordin-like 2                                                       | Negative regulation of BMP signaling pathway                                                                                                                   | 3.005       | 6.76E-05 | 1.31E-02                       | Up-regulated            |
| CHTOP     | Chromatin target of PRMT1                                            | Regulation of transcription, DNA-templated                                                                                                                     | 3.228       | 8.12E-04 | 4.16E-02                       | Up-regulated            |
| CKS2      | CDC28 protein kinase regulatory subunit 2                            | Regulation of cyclin-dependent protein serine/threonine kinase activity                                                                                        | 3.405       | 2.11E-05 | 9.21E-03                       | Up-regulated            |
| CLSTN2    | Calsynenin 2                                                         | Homophilic cell adhesion via plasma membrane adhesion molecules                                                                                                | 4.168       | 7.91E-05 | 1.42E-02                       | Up-regulated            |
| COL9A1    | Collagen, type IX, $\alpha$ 1                                        | Extracellular matrix structural constituent conferring tensile strength                                                                                        | 3.882       | 2.65E-03 | 7.19E-02                       | Up-regulated            |

Continued on next page

**On-line Table 3: Continued**

| Gene Name      | Description                                               | Gene Main Function Determined by Gene Ontology                                                                                                                                                    | Fold Change | P Value  | False Discovery Rate (q Value) | Direction of Expression |
|----------------|-----------------------------------------------------------|---------------------------------------------------------------------------------------------------------------------------------------------------------------------------------------------------|-------------|----------|--------------------------------|-------------------------|
| <i>CTSE</i>    | Cathepsin E                                               | Antigen processing and presentation of exogenous peptide antigen via <i>MHC</i> class II                                                                                                          | 2.614       | 7.10E-04 | 3.84E-02                       | Up-regulated            |
| <i>CXCL13</i>  | Chemokine (C-X-C motif) ligand 13                         | Negative regulation of endothelial cell chemotaxis to fibroblast growth factor                                                                                                                    | 2.257       | 2.84E-04 | 2.64E-02                       | Up-regulated            |
| <i>CXCL8</i>   | Chemokine (C-X-C motif) ligand 8                          | Regulation of single-stranded viral RNA replication via double-stranded DNA intermediate                                                                                                          | 4.781       | 1.32E-05 | 8.84E-03                       | Up-regulated            |
| <i>CXCL8</i>   | Chemokine (C-X-C motif) ligand 8                          | Regulation of single-stranded viral RNA replication via double-stranded DNA intermediate                                                                                                          | 3.11        | 2.45E-04 | 2.48E-02                       | Up-regulated            |
| <i>CXCR4</i>   | Chemokine (C-X-C motif) receptor 4                        | Positive regulation of cytosolic calcium ion concentration                                                                                                                                        | 2.16        | 1.53E-03 | 5.58E-02                       | Up-regulated            |
| <i>DAPL1</i>   | Death associated protein-like 1                           | Cellular response to amino acid starvation                                                                                                                                                        | -3.752      | 6.45E-13 | 6.48E-09                       | Down-regulated          |
| <i>DLGAP5</i>  | Discs, large (Drosophila) homolog-associated protein 5    | Positive regulation of mitotic metaphase/anaphase transition                                                                                                                                      | 2.864       | 2.02E-04 | 2.30E-02                       | Up-regulated            |
| <i>DLL4</i>    | Delta-like 4 (Drosophila)                                 | Negative regulation of blood vessel endothelial cell proliferation involved in sprouting angiogenesis                                                                                             | 2.073       | 5.57E-05 | 1.20E-02                       | Up-regulated            |
| <i>DNASE2B</i> | Deoxyribonuclease II $\beta$                              | Deoxyribonuclease II activity                                                                                                                                                                     | 2.515       | 2.77E-03 | 7.36E-02                       | Up-regulated            |
| <i>DRD1</i>    | Dopamine receptor D1                                      | Positive regulation of cytosolic calcium ion concentration involved in phospholipase C-activating G-protein coupled signaling pathway                                                             | 2.061       | 2.97E-03 | 7.56E-02                       | Up-regulated            |
| <i>DUSP5</i>   | Dual specificity phosphatase 5                            | MAP kinase tyrosine/serine/threonine phosphatase activity                                                                                                                                         | 2.072       | 1.64E-04 | 2.13E-02                       | Up-regulated            |
| <i>E2F1</i>    | E2F transcription factor 1                                | Positive regulation of protein insertion into mitochondrial membrane involved in apoptotic signaling pathway                                                                                      | 2.319       | 9.77E-04 | 4.49E-02                       | Up-regulated            |
| <i>E2F8</i>    | E2F transcription factor 8                                | RNA polymerase II core promoter proximal region sequence-specific DNA binding transcription factor activity involved in negative regulation of transcription                                      | 2.583       | 2.51E-03 | 7.03E-02                       | Up-regulated            |
| <i>EGLN3</i>   | Egl-9 family hypoxia-inducible factor 3                   | Oxidoreductase activity, acting on paired donors, with incorporation or reduction of molecular oxygen, 2-oxoglutarate as one donor, and incorporation of one atom each of oxygen into both donors | 3.25        | 3.50E-05 | 1.13E-02                       | Up-regulated            |
| <i>ENO2</i>    | Enolase 2 ( $\gamma$ , neuronal)                          | Phosphopyruvate hydratase activity                                                                                                                                                                | 2.914       | 4.91E-06 | 4.11E-03                       | Up-regulated            |
| <i>ERO1L</i>   | ERO1-like (S. Cerevisiae)                                 | Oxidoreductase activity, acting on a sulfur group of donors, disulfide as acceptor                                                                                                                | 2.039       | 4.96E-05 | 1.18E-02                       | Up-regulated            |
| <i>ETV4</i>    | Ets variant 4                                             | RNA polymerase II core promoter proximal region sequence-specific DNA binding transcription factor activity involved in positive regulation of transcription                                      | 3.485       | 8.91E-05 | 1.46E-02                       | Up-regulated            |
| <i>EXO1</i>    | Exonuclease 1                                             | Humoral immune response mediated by circulating immunoglobulin                                                                                                                                    | 2.971       | 5.88E-04 | 3.71E-02                       | Up-regulated            |
| <i>EXOC3L1</i> | Exocyst complex component 3-like 1                        | Peptide hormone secretion                                                                                                                                                                         | 2.521       | 2.78E-05 | 1.03E-02                       | Up-regulated            |
| <i>EZH2</i>    | Enhancer of zeste 2 polycomb repressive complex 2 subunit | Skeletal muscle satellite cell maintenance involved in skeletal muscle regeneration                                                                                                               | 2.197       | 3.91E-04 | 2.97E-02                       | Up-regulated            |
| <i>FABP5</i>   | Fatty acid binding protein 5 (psoriasis-associated)       | Phosphatidylcholine biosynthetic process                                                                                                                                                          | 2.436       | 7.69E-05 | 1.42E-02                       | Up-regulated            |
| <i>FAM150A</i> | Family with sequence similarity 150, member A             | Extracellular region                                                                                                                                                                              | -2.555      | 1.97E-05 | 9.21E-03                       | Down-regulated          |
| <i>FAM179A</i> | Family with sequence similarity 179, member A             | Unknown                                                                                                                                                                                           | 2.649       | 2.22E-03 | 6.79E-02                       | Up-regulated            |
| <i>FAM64A</i>  | Family with sequence similarity 64, member A              | Mitotic nuclear division                                                                                                                                                                          | 3.601       | 5.17E-05 | 1.18E-02                       | Up-regulated            |
| <i>FGB</i>     | Fibrinogen $\beta$ chain                                  | Negative regulation of extrinsic apoptotic signaling pathway via death domain receptors                                                                                                           | 2.824       | 1.35E-03 | 5.18E-02                       | Up-regulated            |
| <i>FGF23</i>   | Fibroblast growth factor 23                               | Positive regulation of <i>MAPKKK</i> cascade by fibroblast growth factor receptor signaling pathway                                                                                               | 5.662       | 3.01E-06 | 3.05E-03                       | Up-regulated            |
| <i>FGFBP1</i>  | Fibroblast growth factor binding protein 1                | Activation of mitophagy in response to mitochondrial depolarization                                                                                                                               | -2.183      | 3.00E-05 | 1.04E-02                       | Down-regulated          |
| <i>FOXM1</i>   | Forkhead box M1                                           | DNA damage response, signal transduction by p53 class mediator resulting in transcription of p21 class mediator                                                                                   | 3.239       | 2.11E-04 | 2.33E-02                       | Up-regulated            |
| <i>FTL</i>     | Ferritin, light polypeptide                               | Post-Golgi vesicle-mediated transport                                                                                                                                                             | 2.047       | 1.46E-03 | 5.39E-02                       | Up-regulated            |
| <i>GDF6</i>    | Growth differentiation factor 6                           | Positive regulation of pathway-restricted <i>SMAD</i> protein phosphorylation                                                                                                                     | 2.114       | 4.38E-03 | 9.42E-02                       | Up-regulated            |
| <i>GPRI58</i>  | G protein-coupled receptor 158                            | Regulation of G-protein coupled receptor protein signaling pathway                                                                                                                                | 4.747       | 5.18E-05 | 1.18E-02                       | Up-regulated            |
| <i>GSG2</i>    | Germ cell associated 2 (haspin)                           | Histone H3-T3 phosphorylation involved in chromosome passenger complex localization to kinetochore                                                                                                | 2.725       | 7.60E-04 | 3.95E-02                       | Up-regulated            |
| <i>HAS2</i>    | Hyaluronan synthase 2                                     | Positive regulation of substrate adhesion-dependent cell spreading                                                                                                                                | 2.285       | 3.71E-05 | 1.16E-02                       | Up-regulated            |
| <i>HBB</i>     | Hemoglobin, $\beta$                                       | Positive regulation of nitric oxide biosynthetic process                                                                                                                                          | 2.46        | 1.27E-03 | 5.03E-02                       | Up-regulated            |
| <i>HMG2A</i>   | High mobility group AT-hook 2                             | RNA polymerase II core promoter proximal region sequence-specific DNA binding transcription factor activity involved in negative regulation of transcription                                      | 4.412       | 6.98E-07 | 1.75E-03                       | Up-regulated            |

Continued on next page

On-line Table 3: Continued

| Gene Name       | Description                                                       | Gene Main Function Determined by Gene Ontology                                                 | Fold Change | P Value  | False Discovery Rate (q Value) | Direction of Expression |
|-----------------|-------------------------------------------------------------------|------------------------------------------------------------------------------------------------|-------------|----------|--------------------------------|-------------------------|
| <i>HMMR</i>     | Hyaluronan-mediated motility receptor (RHAMM)                     | Glycosaminoglycan metabolic process                                                            | 3.534       | 5.77E-05 | 1.20E-02                       | Up-regulated            |
| <i>HMOX1</i>    | Heme oxygenase 1                                                  | Regulation of transcription from RNA polymerase II promoter in response to oxidative stress    | 3.643       | 2.77E-04 | 2.62E-02                       | Up-regulated            |
| <i>HP</i>       | Haptoglobin                                                       | Activation of cysteine-type endopeptidase activity involved in apoptotic process               | 2.553       | 4.27E-05 | 1.18E-02                       | Up-regulated            |
| <i>IBSP</i>     | Integrin-binding sialoprotein                                     | Cellular response to growth factor stimulus                                                    | 2.789       | 1.73E-03 | 5.85E-02                       | Up-regulated            |
| <i>ICAM2</i>    | Intercellular adhesion molecule 2                                 | Stimulatory C-type lectin receptor signaling pathway                                           | 2.222       | 2.98E-04 | 2.69E-02                       | Up-regulated            |
| <i>IGF2BP3</i>  | Insulin-like growth factor 2 mRNA binding protein 3               | Regulation of cytokine biosynthetic process                                                    | 2.095       | 1.61E-03 | 5.68E-02                       | Up-regulated            |
| <i>IL12RB2</i>  | Interleukin 12 receptor, $\beta$ 2                                | Positive regulation of interferon- $\gamma$ production                                         | 2.027       | 1.60E-03 | 5.68E-02                       | Up-regulated            |
| <i>IL23A</i>    | Interleukin 23 $\alpha$ subunit p19                               | Positive regulation of granulocyte macrophage colony-stimulating factor production             | 2.748       | 6.82E-04 | 3.81E-02                       | Up-regulated            |
| <i>IL6</i>      | Interleukin 6                                                     | Negative regulation of cysteine-type endopeptidase activity involved in apoptotic process      | 4.375       | 2.86E-05 | 1.03E-02                       | Up-regulated            |
| <i>INHBB</i>    | Inhibin, $\beta$ B                                                | Positive regulation of pathway-restricted SMAD protein phosphorylation                         | 2.545       | 3.85E-04 | 2.97E-02                       | Up-regulated            |
| <i>IQGAP3</i>   | IQ motif containing GTPase activating protein 3                   | Positive regulation of mammary gland epithelial cell proliferation                             | 2.343       | 4.39E-04 | 3.17E-02                       | Up-regulated            |
| <i>IRG1</i>     | Immunoresponsive 1 homolog (mouse)                                | Positive regulation of reactive oxygen species metabolic process                               | 2.668       | 1.16E-03 | 4.85E-02                       | Up-regulated            |
| <i>IYD</i>      | Iodotyrosine deiodinase                                           | Cellular nitrogen compound metabolic process                                                   | 2.745       | 7.77E-05 | 1.42E-02                       | Up-regulated            |
| <i>KIAA0101</i> | Kiaa0101                                                          | Cellular response to DNA damage stimulus                                                       | 3.426       | 8.88E-05 | 1.46E-02                       | Up-regulated            |
| <i>KIF11</i>    | Kinesin family member 11                                          | Antigen processing and presentation of exogenous peptide antigen via MHC class II              | 2.42        | 1.62E-03 | 5.68E-02                       | Up-regulated            |
| <i>KIF14</i>    | Kinesin family member 14                                          | SCF-dependent proteasomal ubiquitin-dependent protein catabolic process                        | 2.574       | 2.67E-04 | 2.55E-02                       | Up-regulated            |
| <i>KIF18B</i>   | Kinesin family member 18B                                         | ATP-dependent microtubule motor activity, plus-end-directed                                    | 4.077       | 1.64E-05 | 9.21E-03                       | Up-regulated            |
| <i>KIF20A</i>   | Kinesin family member 20A                                         | Cell separation after cytokinesis                                                              | 2.645       | 1.25E-04 | 1.88E-02                       | Up-regulated            |
| <i>KIF21A</i>   | Kinesin family member 21A                                         | Microtubule-based movement                                                                     | 2.216       | 2.35E-03 | 6.84E-02                       | Up-regulated            |
| <i>KIF2A</i>    | Kinesin heavy chain member 2A                                     | Antigen processing and presentation of exogenous peptide antigen via MHC class II              | 2.807       | 1.18E-03 | 4.90E-02                       | Up-regulated            |
| <i>KIFC1</i>    | Kinesin family member C1                                          | ATP-dependent microtubule motor activity, minus-end-directed                                   | 2.816       | 5.70E-05 | 1.20E-02                       | Up-regulated            |
| <i>KIT</i>      | V-kit Hardy-Zuckerman 4 feline sarcoma viral oncogene homolog     | Positive regulation of sequence-specific DNA binding transcription factor activity             | 2.278       | 1.80E-04 | 2.18E-02                       | Up-regulated            |
| <i>KLHL3</i>    | Kelch-like family member 3                                        | Protein ubiquitination involved in ubiquitin-dependent protein catabolic process               | 2.011       | 4.94E-05 | 1.18E-02                       | Up-regulated            |
| <i>KRT32</i>    | Keratin 32 type I                                                 | Structural molecule activity                                                                   | 2.815       | 1.23E-03 | 4.96E-02                       | Up-regulated            |
| <i>KRT8</i>     | Keratin 8 type II                                                 | Cell differentiation involved in embryonic placenta development                                | 6.233       | 1.21E-06 | 2.03E-03                       | Up-regulated            |
| <i>LCTL</i>     | Lactase-like                                                      | Hydrolase activity, hydrolyzing O-glycosyl compounds                                           | 2.614       | 1.02E-03 | 4.51E-02                       | Up-regulated            |
| <i>LECT1</i>    | Leukocyte cell derived chemotaxin 1                               | Negative regulation of vascular endothelial growth factor receptor signaling pathway           | -2.373      | 4.32E-04 | 3.17E-02                       | Down-regulated          |
| <i>MAGEL2</i>   | Melanoma antigen family L2                                        | Negative regulation of transcription, DNA-templated                                            | 2.199       | 2.21E-03 | 6.78E-02                       | Up-regulated            |
| <i>MAPK13</i>   | Mitogen-activated protein kinase 13                               | Vascular endothelial growth factor receptor signaling pathway                                  | 2.134       | 1.59E-03 | 5.68E-02                       | Up-regulated            |
| <i>MARCO</i>    | Macrophage receptor with collagenous structure                    | Signaling pattern recognition receptor activity                                                | -2.396      | 2.94E-04 | 2.69E-02                       | Down-regulated          |
| <i>MCM8</i>     | Minichromosome maintenance complex component 8                    | Double-strand break repair via homologous recombination                                        | 2.348       | 1.83E-03 | 6.02E-02                       | Up-regulated            |
| <i>MELK</i>     | Maternal embryonic leucine zipper kinase                          | Intrinsic apoptotic signaling pathway in response to oxidative stress                          | 3.352       | 7.12E-04 | 3.84E-02                       | Up-regulated            |
| <i>MFSD5</i>    | Major facilitator superfamily domain containing 5                 | Substrate-specific transmembrane transporter activity                                          | 3.465       | 3.53E-06 | 3.23E-03                       | Up-regulated            |
| <i>MMP1</i>     | Matrix metalloproteinase 1                                        | Positive regulation of protein oligomerization                                                 | 4.467       | 5.20E-04 | 3.50E-02                       | Up-regulated            |
| <i>MOGAT1</i>   | Monoacylglycerol O-acyltransferase 1                              | 2-Acylglycerol O-acyltransferase activity                                                      | 2.672       | 4.51E-04 | 3.21E-02                       | Up-regulated            |
| <i>MRPL32</i>   | Mitochondrial ribosomal protein L32                               | Mitochondrial translational termination                                                        | 2.448       | 2.07E-05 | 9.21E-03                       | Up-regulated            |
| <i>MSH5</i>     | Muts homolog 5                                                    | Homologous chromosome segregation                                                              | 2.293       | 1.90E-03 | 6.13E-02                       | Up-regulated            |
| <i>MTFP1</i>    | Mitochondrial fission process 1                                   | Integral component of membrane                                                                 | 2.889       | 3.11E-04 | 2.69E-02                       | Up-regulated            |
| <i>MYH7B</i>    | Myosin, heavy chain 7B, cardiac muscle, $\beta$                   | Metabolic process                                                                              | -2.107      | 4.66E-04 | 3.27E-02                       | Down-regulated          |
| <i>NCAPG</i>    | Non-SMC condensin I complex, subunit G                            | Mitotic chromosome condensation                                                                | 2.472       | 1.55E-03 | 5.61E-02                       | Up-regulated            |
| <i>NEK2</i>     | NIMA-related kinase 2                                             | Anaphase-promoting complex-dependent proteasomal ubiquitin-dependent protein catabolic process | 3.311       | 5.83E-05 | 1.20E-02                       | Up-regulated            |
| <i>NKAIN1</i>   | Na <sup>+</sup> /K <sup>+</sup> transporting ATPase interacting 1 | Regulation of sodium ion transport                                                             | 3.127       | 1.27E-04 | 1.88E-02                       | Up-regulated            |
| <i>NUF2</i>     | NUF2 NDC80 kinetochore complex component                          | Small GTPase mediated signal transduction                                                      | 2.809       | 4.32E-04 | 3.17E-02                       | Up-regulated            |
| <i>PBK</i>      | PDZ binding kinase                                                | Negative regulation of proteasomal ubiquitin-dependent protein catabolic process               | 2.589       | 2.36E-03 | 6.84E-02                       | Up-regulated            |

Continued on next page

On-line Table 3: Continued

| Gene Name       | Description                                                                                                 | Gene Main Function Determined by Gene Ontology                                                                                                               | Fold Change | P Value  | False Discovery Rate (q Value) | Direction of Expression |
|-----------------|-------------------------------------------------------------------------------------------------------------|--------------------------------------------------------------------------------------------------------------------------------------------------------------|-------------|----------|--------------------------------|-------------------------|
| <i>PDE4B</i>    | Phosphodiesterase 4B, camp-specific                                                                         | Regulation of high voltage-gated calcium channel activity                                                                                                    | 2.371       | 2.92E-03 | 7.52E-02                       | Up-regulated            |
| <i>PDGFB</i>    | Platelet-derived growth factor $\beta$ polypeptide                                                          | Positive regulation of metanephric mesenchymal cell migration by platelet-derived growth factor receptor- $\beta$ signaling pathway                          | 2.094       | 2.09E-04 | 2.33E-02                       | Up-regulated            |
| <i>PIGR</i>     | Polymeric immunoglobulin receptor                                                                           | Immunoglobulin transcytosis in epithelial cells mediated by polymeric immunoglobulin receptor                                                                | 2.808       | 2.84E-03 | 7.44E-02                       | Up-regulated            |
| <i>PLA2G4F</i>  | Phospholipase A2 group IVF                                                                                  | Phosphatidylethanolamine acyl-chain remodeling                                                                                                               | 2.094       | 2.56E-03 | 7.10E-02                       | Up-regulated            |
| <i>PLK1</i>     | Polo-like kinase 1                                                                                          | Positive regulation of ubiquitin-protein ligase activity involved in regulation of mitotic cell cycle transition                                             | 2.09        | 1.07E-04 | 1.65E-02                       | Up-regulated            |
| <i>POU2AF1</i>  | POU class 2 associating factor 1                                                                            | Transcription from RNA polymerase II promoter                                                                                                                | 2.267       | 2.78E-03 | 7.36E-02                       | Up-regulated            |
| <i>PRND</i>     | Prion protein 2 (dublet)                                                                                    | Anchored component of membrane                                                                                                                               | 8.719       | 2.78E-06 | 3.05E-03                       | Up-regulated            |
| <i>PRR11</i>    | Proline rich 11                                                                                             | Regulation of cell cycle                                                                                                                                     | 3.068       | 7.26E-04 | 3.88E-02                       | Up-regulated            |
| <i>PTGS2</i>    | Prostaglandin-endoperoxide synthase 2 (prostaglandin G/h synthase and cyclooxygenase)                       | Positive regulation of cell migration involved in sprouting angiogenesis                                                                                     | 3.434       | 3.07E-08 | 1.54E-04                       | Up-regulated            |
| <i>PTX3</i>     | Pentraxin 3 long                                                                                            | RNA polymerase II core promoter proximal region sequence-specific DNA binding transcription factor activity involved in positive regulation of transcription | 2.42        | 1.95E-04 | 2.25E-02                       | Up-regulated            |
| <i>PVRL2</i>    | Poliovirus receptor-related 2 (herpesvirus entry mediator B)                                                | Positive regulation of natural killer cell mediated cytotoxicity directed against tumor cell target                                                          | 2.069       | 4.62E-03 | 9.68E-02                       | Up-regulated            |
| <i>RACGAP1</i>  | Rac GTPase activating protein 1                                                                             | Antigen processing and presentation of exogenous peptide antigen via <i>MHC</i> class II                                                                     | 2.331       | 4.38E-04 | 3.17E-02                       | Up-regulated            |
| <i>RAD51AP1</i> | <i>RAD51</i> associated protein 1                                                                           | Regulation of double-strand break repair via homologous recombination                                                                                        | 2.328       | 1.76E-03 | 5.90E-02                       | Up-regulated            |
| <i>RELT</i>     | RELT tumor necrosis factor receptor                                                                         | Integral component of membrane                                                                                                                               | 2.375       | 3.14E-04 | 2.69E-02                       | Up-regulated            |
| <i>RMI2</i>     | Recq mediated genome instability 2                                                                          | DNA replication                                                                                                                                              | 2.847       | 7.08E-04 | 3.84E-02                       | Up-regulated            |
| <i>RPS6KL1</i>  | Ribosomal protein S6 kinase-like 1                                                                          | Intracellular membrane-bounded organelle                                                                                                                     | 2.792       | 3.61E-04 | 2.85E-02                       | Up-regulated            |
| <i>RTN4RL2</i>  | Reticulon 4 receptor-like 2                                                                                 | Anchored component of plasma membrane                                                                                                                        | 2.414       | 1.27E-04 | 1.88E-02                       | Up-regulated            |
| <i>SI00A8</i>   | SI00 calcium binding protein A8                                                                             | Activation of cysteine-type endopeptidase activity involved in apoptotic process                                                                             | 2.915       | 9.91E-04 | 4.49E-02                       | Up-regulated            |
| <i>SIPR3</i>    | Sphingosine-1-phosphate receptor 3                                                                          | Adenylate cyclase-inhibiting G-protein coupled receptor signaling pathway                                                                                    | 2.149       | 4.05E-03 | 9.11E-02                       | Up-regulated            |
| <i>SCG2</i>     | Secretogranin II                                                                                            | Negative regulation of sequence-specific DNA binding transcription factor activity                                                                           | 3.446       | 6.64E-04 | 3.81E-02                       | Up-regulated            |
| <i>SCIMP</i>    | <i>SLP</i> adaptor and <i>CSK</i> interacting membrane protein                                              | Positive regulation of <i>ERK1</i> and <i>ERK2</i> cascade                                                                                                   | 2.813       | 3.97E-03 | 9.05E-02                       | Up-regulated            |
| <i>SCIN</i>     | Scinderin                                                                                                   | Positive regulation of megakaryocyte differentiation                                                                                                         | -2.287      | 1.20E-05 | 8.63E-03                       | Down-regulated          |
| <i>SCN4A</i>    | Sodium channel, voltage gated, type IV $\alpha$ subunit                                                     | Membrane depolarization during action potential                                                                                                              | 3.215       | 6.10E-04 | 3.81E-02                       | Up-regulated            |
| <i>SELE</i>     | Selectin E                                                                                                  | Heterophilic cell-cell adhesion via plasma membrane cell adhesion molecules                                                                                  | 2.299       | 1.69E-04 | 2.13E-02                       | Up-regulated            |
| <i>SERPINF2</i> | Serpin peptidase inhibitor, clade F ( $\alpha$ -2 antiplasmin, pigment epithelium derived factor), member 2 | Positive regulation of transcription from RNA polymerase II promoter                                                                                         | 2.666       | 3.25E-04 | 2.69E-02                       | Up-regulated            |
| <i>SIRPB1</i>   | Signal-regulatory protein $\beta$ 1                                                                         | Cell surface receptor signaling pathway                                                                                                                      | 2.393       | 2.90E-03 | 7.51E-02                       | Up-regulated            |
| <i>SIRPB1</i>   | Signal-regulatory protein $\beta$ 1                                                                         | Cell surface receptor signaling pathway                                                                                                                      | 3.979       | 3.31E-04 | 2.73E-02                       | Up-regulated            |
| <i>SIRPB1</i>   | Signal-regulatory protein $\beta$ 1                                                                         | Cell surface receptor signaling pathway                                                                                                                      | 5.463       | 9.20E-05 | 1.47E-02                       | Up-regulated            |
| <i>SLC11A1</i>  | Solute carrier family 11 (proton-coupled divalent metal ion transporter), member 1                          | Positive regulation of dendritic cell antigen processing and presentation                                                                                    | 3.851       | 4.68E-05 | 1.18E-02                       | Up-regulated            |
| <i>SLC16A6</i>  | Solute carrier family 16 member 6                                                                           | Monocarboxylic acid transmembrane transporter activity                                                                                                       | 2.335       | 6.66E-04 | 3.81E-02                       | Up-regulated            |
| <i>SLC45A1</i>  | Solute carrier family 45 member 1                                                                           | Glucose transmembrane transporter activity                                                                                                                   | 2.059       | 1.38E-03 | 5.26E-02                       | Up-regulated            |
| <i>SLC4A2</i>   | Solute carrier family 4 (anion exchanger), member 2                                                         | Anion transmembrane transporter activity                                                                                                                     | 2.497       | 8.88E-05 | 1.46E-02                       | Up-regulated            |
| <i>SMCO2</i>    | Single-pass membrane protein with coiled-coil domains 2                                                     | Integral component of membrane                                                                                                                               | 2.498       | 1.35E-03 | 5.18E-02                       | Up-regulated            |
| <i>SNORA7B</i>  | Small nucleolar RNA, H/ACA box 7B                                                                           | Unknown                                                                                                                                                      | 2.601       | 5.27E-04 | 3.53E-02                       | Up-regulated            |
| <i>SNORD10</i>  | Small nucleolar RNA, C/D box 10                                                                             | Unknown                                                                                                                                                      | 2.58        | 2.57E-05 | 1.03E-02                       | Up-regulated            |
| <i>SPAG5</i>    | Sperm associated antigen 5                                                                                  | Regulation of attachment of spindle microtubules to kinetochore                                                                                              | 3.315       | 3.73E-04 | 2.90E-02                       | Up-regulated            |
| <i>SRCINI</i>   | <i>SRC</i> kinase signaling inhibitor 1                                                                     | Negative regulation of protein tyrosine kinase activity                                                                                                      | -3.295      | 1.98E-05 | 9.21E-03                       | Down-regulated          |
| <i>STIL</i>     | <i>SCL/TAL1</i> interrupting locus                                                                          | Positive regulation of cyclin-dependent protein serine/threonine kinase activity                                                                             | 3.04        | 8.47E-04 | 4.21E-02                       | Up-regulated            |
| <i>STMN1</i>    | Stathmin 1                                                                                                  | Positive regulation of cellular component movement                                                                                                           | 2.375       | 2.46E-03 | 6.98E-02                       | Up-regulated            |
| <i>TCF19</i>    | Transcription factor 19                                                                                     | Regulation of transcription from RNA polymerase II promoter                                                                                                  | 2.509       | 5.69E-04 | 3.61E-02                       | Up-regulated            |
| <i>TDRD5</i>    | Tudor domain containing 5                                                                                   | DNA methylation involved in gamete generation                                                                                                                | 2.201       | 4.27E-05 | 1.18E-02                       | Up-regulated            |
| <i>TIMP1</i>    | <i>TIMP</i> metalloproteinase inhibitor 1                                                                   | Negative regulation of membrane protein ectodomain proteolysis                                                                                               | 2.104       | 6.23E-04 | 3.81E-02                       | Up-regulated            |

Continued on next page



**On-line Table 3: Continued**

| Gene Name       | Description                                                                          | Gene Main Function Determined by Gene Ontology                                                                                     | Fold Change | P Value  | False Discovery Rate (q Value) | Direction of Expression |
|-----------------|--------------------------------------------------------------------------------------|------------------------------------------------------------------------------------------------------------------------------------|-------------|----------|--------------------------------|-------------------------|
| <i>TM4SF18</i>  | Transmembrane 4 L six family member 18                                               | Integral component of membrane                                                                                                     | 2.77        | 8.79E-05 | 1.46E-02                       | Up-regulated            |
| <i>TMEM151B</i> | Transmembrane protein 151B                                                           | Integral component of membrane                                                                                                     | 3.543       | 3.14E-04 | 2.69E-02                       | Up-regulated            |
| <i>TREML2</i>   | Triggering receptor expressed on myeloid cells-like 2                                | Integral component of membrane                                                                                                     | 2.352       | 4.73E-03 | 9.82E-02                       | Up-regulated            |
| <i>TRIML2</i>   | Tripartite motif family-like 2                                                       | Response to retinoic acid                                                                                                          | 3.336       | 1.35E-03 | 5.18E-02                       | Up-regulated            |
| <i>TROAP</i>    | Trophinin associated protein                                                         | Protein binding                                                                                                                    | 3.307       | 3.13E-04 | 2.69E-02                       | Up-regulated            |
| <i>TTC7A</i>    | Tetratricopeptide repeat domain 7A                                                   | Cellular iron ion homeostasis                                                                                                      | 2.378       | 4.50E-05 | 1.18E-02                       | Up-regulated            |
| <i>TUBA4A</i>   | Tubulin, $\alpha$ 4a                                                                 | "De novo" posttranslational protein folding                                                                                        | 3.447       | 2.11E-05 | 9.21E-03                       | Up-regulated            |
| <i>TVP23A</i>   | Trans-Golgi network vesicle protein 23 homolog A ( <i>Saccharomyces Cerevisiae</i> ) | Integral component of Golgi membrane                                                                                               | 2.283       | 2.84E-03 | 7.44E-02                       | Up-regulated            |
| <i>UBE2T</i>    | Ubiquitin-conjugating enzyme E2T                                                     | Cellular response to DNA damage stimulus                                                                                           | 2.696       | 5.67E-04 | 3.61E-02                       | Up-regulated            |
| <i>UGGT2</i>    | UDP-glucose glycoprotein glucosyltransferase 2                                       | UDP-glucose: glycoprotein glucosyltransferase activity                                                                             | 2.213       | 2.19E-03 | 6.78E-02                       | Up-regulated            |
| <i>VEGFA</i>    | Vascular endothelial growth factor A                                                 | Positive regulation of endothelial cell chemotaxis by VEGF-activated vascular endothelial growth factor receptor signaling pathway | 2.741       | 1.63E-06 | 2.33E-03                       | Up-regulated            |
| <i>WSCD1</i>    | WSC domain containing 1                                                              | Integral component of membrane                                                                                                     | 2.752       | 3.83E-05 | 1.16E-02                       | Up-regulated            |
| <i>ZMYND15</i>  | Zinc finger, MYND-type containing 15                                                 | Negative regulation of transcription, DNA-templated                                                                                | 2.43        | 1.69E-03 | 5.80E-02                       | Up-regulated            |
| <i>ZWILCH</i>   | Zwilch kinetochore protein                                                           | Small GTPase mediated signal transduction                                                                                          | 3.099       | 3.48E-05 | 1.13E-02                       | Up-regulated            |

<sup>a</sup> Genes were determined to be differentially expressed if the P value was < .05, the false discovery rate was <0.01, and the fold change was >2 (up-regulated) or  $\leq$ 2 (down-regulated). Gene variations were determined by IPA software. The main functions of genes were determined using gene ontology (<http://geneontology.org/>).

**On-line Table 4: Most involved canonical pathways, flow-diverted versus control, determined by IPA**

| Canonical Biologic Pathway                        | No. of Genes |                | Genes                                                              | No. of Genes   |              |
|---------------------------------------------------|--------------|----------------|--------------------------------------------------------------------|----------------|--------------|
|                                                   | Up-Regulated | Down-Regulated |                                                                    | Down-Regulated | Genes        |
| Atherosclerosis signaling                         | 9            | 0              | <i>CCL2, CXCL8, CXCR4, IL6, MMP1, PDGFB, PLA2G4F, S100A8, SELE</i> | 0              | NA           |
| Mitotic roles of pololike kinase                  | 7            | 0              | <i>CCNB1, CCNB2, CDC20, CDC25A, CDK1, KIF11, PLK1</i>              | 0              | NA           |
| Hepatic fibrosis/hepatic stellate cell activation | 8            | 1              | <i>CCL2, COL9A1, CXCL8, IL6, MMP1, PDGFB, TIMP1, VEGFA</i>         | 1              | <i>MYH7B</i> |
| Agranulocyte adhesion and diapedesis              | 8            | 1              | <i>CCL2, CDH5, CXCL8, CXCL13, CXCR4, ICAM2, MMP1, SELE</i>         | 1              | <i>MYH7B</i> |
| Interleukin-17 signaling                          | 6            | 0              | <i>CCL2, CXCL8, IL6, MAPK13, PTGS2, TIMP1</i>                      | 0              | NA           |

**Note:**—NA indicates not applicable.

**On-line Table 5: Results of RT-PCR and RNA-seq for selected molecules in coiled and flow-diverted aneurysms<sup>a</sup>**

| Molecule      | Coils versus Untreated Aneurysm |         | Flow-Diverted versus Untreated Aneurysm |         |
|---------------|---------------------------------|---------|-----------------------------------------|---------|
|               | RT-PCR                          | RNA-Seq | RT-PCR                                  | RNA-Seq |
| <i>PRND</i>   | 5.8                             | 3.6     | 8.7                                     | 4.3     |
| <i>FGF23</i>  | 7.4                             | 6.5     | 5.7                                     | 3.7     |
| <i>MMP1</i>   | 8.1                             | 8.0     | 4.5                                     | 3.9     |
| <i>SRCIN1</i> | -4.2                            | -3.3    | -3.3                                    | -2.4    |
| <i>DAPL1</i>  | -3.9                            | -4.2    | -3.8                                    | -4.2    |
| <i>HHIP</i>   | -3.5                            | -4.1    | x                                       | x       |

**Note:**—RT-PCR indicates reverse transcription polymerase chain reaction.

<sup>a</sup> Values are expressed as log-fold changes.
